# Supplementary material for: Coaxial versus perpendicular structures for a range of binuclear cyclopentadienylpalladium derivatives
Source: Royal Society of Chemistry journal article supplement (doi:10.1039/c2nj40931c), 2012-12-18
Supplement: c2nj40931c.pdf [file c2nj40931c.pdf]

# Coaxial Versus Perpendicular Structures for a Range of Binuclear Cyclopentadienylpalladium Derivatives

Aiping Peng,<sup>a,b</sup> Xiuhui Zhang,<sup>\*a,b</sup> Qian-shu Li,<sup>c,d</sup> R. Bruce King,<sup>\*d,e</sup> and Henry F. Schaefer, III<sup>e</sup>

<sup>a</sup>Key Laboratory of Cluster Science, Ministry of Education of China, School of Chemistry, Beijing Institute of Technology, Beijing 100081, P. R. China

<sup>b</sup>State Key Laboratory of Explosion Science and Technology, Beijing Institute of Technology, Beijing 100081, PR China

<sup>c</sup>MOE Key Laboratory of Theoretical Chemistry of Environment, Center for Computational Quantum Chemistry, South China Normal University, Guangzhou 510006, PR China

<sup>d</sup>Center for Computational Quantum Chemistry, School of Chemistry and Environment, South China Normal University, Guangzhou 510631, P. R. China

<sup>e</sup>Department of Chemistry and Center for Computational Chemistry, University of Georgia, Athens, Georgia 30606, USA

## Supporting Information

Tables S1 to S6 Total energies (E, in hartree) for the optimized  $\text{Cp}_2\text{Pd}_2\text{X}_2$  (X = F, Cl, and CN) and  $\text{Cp}_2\text{Pd}_2\text{L}_2$  (L = CO, CS, and  $\text{CNCH}_3$ )

Tables S7 to S10 Coordinates of  $\text{Cp}_2\text{Pd}_2\text{F}_2$ .

Tables S11 to S14 Coordinates of  $\text{Cp}_2\text{Pd}_2\text{Cl}_2$ .

Tables S15 to S20 Coordinates of  $\text{Cp}_2\text{Pd}_2(\text{CN})_2$ .

Tables S21 to S24 Coordinates of  $\text{Cp}_2\text{Pd}_2(\text{CO})_2$ .

Tables S25 to S28 Coordinates of  $\text{Cp}_2\text{Pd}_2(\text{CNCH}_3)_2$ .

Tables S29 to S32 Coordinates of  $\text{Cp}_2\text{Pd}_2(\text{CS})_2$ .

Tables S33 to S36 Harmonic vibrational frequencies of  $\text{Cp}_2\text{Pd}_2\text{F}_2$ .

Tables S37 to S40 Harmonic vibrational frequencies of  $\text{Cp}_2\text{Pd}_2\text{Cl}_2$ .

Tables S41 to S46 Harmonic vibrational frequencies of  $\text{Cp}_2\text{Pd}_2(\text{CN})_2$ .

Tables S47 to S50 Harmonic vibrational frequencies of  $\text{Cp}_2\text{Pd}_2(\text{CO})_2$ .

Tables S51 to S54 Harmonic vibrational frequencies of  $\text{Cp}_2\text{Pd}_2(\text{CNCH}_3)_2$ .

Tables S55 to S58 Harmonic vibrational frequencies of  $\text{Cp}_2\text{Pd}_2(\text{CS})_2$ .

Complete Gaussian 09 reference (Reference 10)

Table S1 Total energies (E, in hartree) for the  $\text{Cp}_2\text{Pd}_2\text{F}_2$  structures. None of the four structures has any imaginary vibrational frequencies.

|          |   | <b>2F-1S</b> ( $C_1$ ) | <b>2F-2S</b> ( $C_{2v}$ ) | <b>2F-3S</b> ( $C_{2v}$ ) | <b>2F-4S</b> ( $C_1$ ) |
|----------|---|------------------------|---------------------------|---------------------------|------------------------|
| MPW1PW91 | E | -842.445289            | -842.425057               | -842.422985               | -842.418790            |
| BP86     | E | -842.719341            | -842.715616               | -842.691221               | -842.694784            |

Table S2 Total energies (E, in hartree) for the  $\text{Cp}_2\text{Pd}_2\text{Cl}_2$  structures. None of the four structures has any imaginary vibrational frequencies.

|          |   | <b>2Cl-1S</b> ( $C_{2v}$ ) | <b>2Cl-2S</b> ( $C_{2v}$ ) | <b>2Cl-3S</b> ( $C_1$ ) | <b>2Cl-4S</b> ( $C_1$ ) |
|----------|---|----------------------------|----------------------------|-------------------------|-------------------------|
| MPW1PW91 | E | -1563.206756               | -1563.204405               | -1563.194101            | -1563.193070            |
| BP86     | E | -1563.489969               | -1563.467372               | -1563.465796            | -1563.465076            |

Table S3 Total energies (E, in hartree) for the  $\text{Cp}_2\text{Pd}_2(\text{CN})_2$  structures. None of these structures has any imaginary vibrational frequencies.

|          |  | <b>2CN-1S</b><br>( $C_1$ ) | <b>2CN-2S</b><br>( $C_2/C_1$ ) | <b>2CN-3S</b><br>( $C_s$ ) | <b>2CN-4S</b><br>( $C_1$ ) | <b>2CN-5S</b><br>( $C_{2v}$ ) | <b>2CN-6S</b><br>( $C_{2h}$ ) |
|----------|--|----------------------------|--------------------------------|----------------------------|----------------------------|-------------------------------|-------------------------------|
| MPW1PW91 |  | -828.396983                | -828.388773                    | -828.388071                | -828.376571                | -828.373895                   | -828.364871                   |
| BP86     |  | -828.676915                | -828.667757                    | -828.665735                | -828.658730                | -828.655692                   | -828.658882                   |

Table S4 Total energies (E, in hartree) and numbers of imaginary vibrational frequencies (Nimag) for the  $\text{Cp}_2\text{Pd}_2(\text{CO})_2$  structures.

|          |       | <b>2CO-1S</b> ( $C_{2v}$ ) | <b>2CO-2S</b> ( $C_{2h}$ ) | <b>2CO-3S</b> ( $C_{2v}$ ) | <b>2CO-4S</b> ( $C_1$ ) |
|----------|-------|----------------------------|----------------------------|----------------------------|-------------------------|
| MPW1PW91 | E     | -869.416094                | -869.412878                | -869.411456                | -869.404737             |
|          | Nimag | 0                          | 0                          | 0                          | 0                       |
| BP86     | E     | -869.723284                | -869.712856                | -869.710819                | -869.708258             |
|          | Nimag | 1(11i) <sup>a</sup>        | 0                          | 0                          | 0                       |

<sup>a</sup> Denotes the imaginary vibrational frequency diminishing after using the finer (120, 974) grid.

Table S5 Total energies (E, in hartree) for the  $\text{Cp}_2\text{Pd}_2(\text{CNCH}_3)_2$  structures. None of these structures has any imaginary vibrational frequencies.

|          |   | <b>2CNCH<sub>3</sub>-1S</b><br>( $C_s$ ) | <b>2CNCH<sub>3</sub>-2S</b><br>( $C_2$ ) | <b>2CNCH<sub>3</sub>-3S</b><br>( $C_2$ ) | <b>2CNCH<sub>3</sub>-4S</b><br>( $C_1$ ) |
|----------|---|------------------------------------------|------------------------------------------|------------------------------------------|------------------------------------------|
| MPW1PW91 | E | -908.139419                              | -908.138843                              | -908.138598                              | -908.138504                              |
| BP86     | E | -908.438575                              | -908.446189                              | -908.437272                              | -908.446007                              |

Table S6 Total energies (E, in hartree) and numbers of imaginary vibrational frequencies (Nimag) for the  $\text{Cp}_2\text{Pd}_2(\text{CS})_2$  structures.

|          |       | 2CS-1S              | 2CS-2S       | 2CS-3S       | 2CS-4S       |
|----------|-------|---------------------|--------------|--------------|--------------|
|          |       | ( $C_{2v}$ )        | ( $C_1$ )    | ( $C_{2h}$ ) | ( $C_{2v}$ ) |
| MPW1PW91 | E     | -1515.300659        | -1515.270062 | -1515.264746 | -1515.264217 |
|          | Nimag | 2(<4i) <sup>a</sup> | 0            | 0            | 0            |
| BP86     | E     | -1515.618811        | -1515.589108 | -1515.583574 | -1515.582663 |
|          | Nimag | 0                   | 0            | 0            | 0            |

<sup>a</sup> These imaginary vibrational frequencies are eliminated using the finer (120, 974) grid.

Table S7 Theoretical cartesian coordinates (in Å) of  $\text{Cp}_2\text{Pd}_2\text{F}_2$  **2F-1S** using the MPW1PW91 and BP86 methods

| Atom | MPW1PW91  |           |           | BP86      |           |           |
|------|-----------|-----------|-----------|-----------|-----------|-----------|
|      | X         | Y         | Z         | X         | Y         | Z         |
| Pd   | -0.037596 | -1.422679 | -0.170338 | -0.083536 | -1.426768 | -0.167837 |
| Pd   | -0.167324 | 1.061630  | -0.099026 | -0.130471 | 1.086259  | -0.098431 |
| C    | -2.421868 | -0.831475 | -0.709869 | -2.444159 | -0.823268 | -0.707282 |
| C    | -2.457356 | 0.566357  | -0.516288 | -2.447483 | 0.596346  | -0.553252 |
| C    | -2.123834 | 0.839792  | 0.860286  | -2.121683 | 0.904043  | 0.830948  |
| C    | -2.087499 | -1.451956 | 0.549134  | -2.136329 | -1.420301 | 0.585941  |
| C    | -1.885277 | -0.413548 | 1.506612  | -1.923091 | -0.349252 | 1.524821  |
| C    | 1.646209  | -0.763748 | -1.375581 | 1.618868  | -0.828566 | -1.391916 |
| C    | 1.579235  | 0.719470  | -1.339398 | 1.597245  | 0.667537  | -1.363387 |
| C    | 1.967866  | 1.155656  | -0.063640 | 2.017565  | 1.104165  | -0.074760 |
| C    | 2.085733  | -1.228845 | -0.121465 | 2.057549  | -1.305221 | -0.118801 |
| C    | 2.518141  | -0.029684 | 0.705303  | 2.540114  | -0.104578 | 0.701716  |
| F    | 2.117110  | -0.081595 | 2.025263  | 2.132201  | -0.136353 | 2.046881  |
| H    | 2.209116  | 2.183013  | 0.190353  | 2.318701  | 2.130381  | 0.163853  |
| H    | 1.469294  | 1.344931  | -2.219440 | 1.517603  | 1.293975  | -2.258714 |
| H    | 3.619720  | 0.027312  | 0.720794  | 3.654312  | -0.085091 | 0.727165  |
| H    | 1.638885  | -1.331329 | -2.302165 | 1.599565  | -1.404623 | -2.325485 |
| H    | 2.527019  | -2.207953 | 0.050594  | 2.483565  | -2.302642 | 0.052993  |
| H    | -2.704524 | -1.351116 | -1.618707 | -2.742460 | -1.366114 | -1.609596 |
| H    | -2.218699 | -2.505659 | 0.789930  | -2.297075 | -2.472410 | 0.859249  |
| H    | -1.668785 | -0.551184 | 2.559109  | -1.706510 | -0.461907 | 2.590395  |
| H    | -2.766702 | 1.305125  | -1.246761 | -2.743654 | 1.324733  | -1.313765 |
| H    | -2.229143 | 1.800494  | 1.353833  | -2.224692 | 1.886948  | 1.303745  |
| F    | -0.270215 | 3.028543  | -0.120526 | -0.195157 | 3.077986  | -0.107513 |

Table S8 Theoretical cartesian coordinates (in Å) of  $\text{Cp}_2\text{Pd}_2\text{F}_2$  **2F-2S** using the MPW1PW91 and BP86 methods

| Atom | MPW1PW91  |           |           | BP86      |           |           |
|------|-----------|-----------|-----------|-----------|-----------|-----------|
|      | X         | Y         | Z         | X         | Y         | Z         |
| Pd   | 0.000000  | 1.236073  | -0.035303 | 0.000000  | 1.261743  | -0.043756 |
| Pd   | 0.000000  | -1.236073 | -0.035303 | 0.000000  | -1.261743 | -0.043756 |
| C    | -1.846269 | 0.735668  | 1.017426  | 2.215606  | 1.176912  | -0.268439 |
| C    | -1.846269 | -0.735668 | 1.017426  | 2.404958  | 0.000000  | -1.074678 |
| C    | -2.164665 | -1.168833 | -0.307395 | 2.215606  | -1.176912 | -0.268439 |
| C    | -2.164665 | 1.168833  | -0.307395 | 1.817017  | 0.744381  | 1.051868  |
| C    | -2.282150 | 0.000000  | -1.119908 | 1.817017  | -0.744381 | 1.051868  |
| C    | 1.846269  | 0.735668  | 1.017426  | -2.215606 | 1.176912  | -0.268439 |
| C    | 1.846269  | -0.735668 | 1.017426  | -2.404958 | 0.000000  | -1.074678 |
| C    | 2.164665  | -1.168833 | -0.307395 | -2.215606 | -1.176912 | -0.268439 |
| C    | 2.164665  | 1.168833  | -0.307395 | -1.817017 | 0.744381  | 1.051868  |
| C    | 2.282150  | 0.000000  | -1.119908 | -1.817017 | -0.744381 | 1.051868  |
| F    | 0.000000  | 3.258025  | -0.065667 | 0.000000  | 3.293160  | -0.177534 |
| H    | 2.374187  | -2.190023 | -0.607363 | -2.445130 | -2.207539 | -0.557410 |
| H    | 1.894577  | -1.350104 | 1.910077  | -2.645600 | 0.000000  | -2.142995 |
| H    | 2.454295  | 0.000000  | -2.191400 | -1.845172 | -1.359556 | 1.957671  |
| H    | 1.894577  | 1.350104  | 1.910077  | -2.445130 | 2.207539  | -0.557410 |
| H    | 2.374187  | 2.190023  | -0.607363 | -1.845172 | 1.359556  | 1.957671  |
| H    | -1.894577 | 1.350104  | 1.910077  | 2.445130  | 2.207539  | -0.557410 |
| H    | -2.374187 | 2.190023  | -0.607363 | 1.845172  | 1.359556  | 1.957671  |
| H    | -2.454295 | 0.000000  | -2.191400 | 1.845172  | -1.359556 | 1.957671  |
| H    | -1.894577 | -1.350104 | 1.910077  | 2.645600  | 0.000000  | -2.142995 |
| H    | -2.374187 | -2.190023 | -0.607363 | 2.445130  | -2.207539 | -0.557410 |
| F    | 0.000000  | -3.258025 | -0.065667 | 0.000000  | -3.293160 | -0.177534 |

Table S9 Theoretical cartesian coordinates (in Å) of Cp<sub>2</sub>Pd<sub>2</sub>F<sub>2</sub> **2F-3S** using the MPW1PW91 and BP86 methods

| Atom | MPW1PW91  |           |           | BP86      |           |           |
|------|-----------|-----------|-----------|-----------|-----------|-----------|
|      | X         | Y         | Z         | X         | Y         | Z         |
| C    | -0.682324 | 3.762241  | 1.110200  | -0.687506 | 3.927318  | 1.050736  |
| H    | -1.337475 | 3.874814  | 1.965971  | -1.350364 | 4.132978  | 1.896082  |
| C    | 0.682324  | 3.762241  | 1.110200  | 0.687506  | 3.927318  | 1.050736  |
| H    | 1.337475  | 3.874814  | 1.965971  | 1.350364  | 4.132978  | 1.896082  |
| C    | 1.128178  | 3.426156  | -0.261651 | 1.139585  | 3.446821  | -0.293499 |
| H    | 2.164737  | 3.388126  | -0.580085 | 2.186309  | 3.388662  | -0.611403 |
| C    | 0.000000  | 3.486284  | -1.129679 | 0.000000  | 3.425373  | -1.177958 |
| H    | 0.000000  | 3.415440  | -2.210305 | 0.000000  | 3.295205  | -2.263544 |
| C    | -1.128178 | 3.426156  | -0.261651 | -1.139585 | 3.446821  | -0.293499 |
| H    | -2.164737 | 3.388126  | -0.580085 | -2.186309 | 3.388662  | -0.611403 |
| C    | 0.000000  | -3.486284 | -1.129679 | 0.000000  | -3.425373 | -1.177958 |
| H    | 0.000000  | -3.415440 | -2.210305 | 0.000000  | -3.295205 | -2.263544 |
| C    | -1.128178 | -3.426156 | -0.261651 | -1.139585 | -3.446821 | -0.293499 |
| H    | -2.164737 | -3.388126 | -0.580085 | -2.186309 | -3.388662 | -0.611403 |
| C    | -0.682324 | -3.762241 | 1.110200  | -0.687506 | -3.927318 | 1.050736  |
| H    | -1.337475 | -3.874814 | 1.965971  | -1.350364 | -4.132978 | 1.896082  |
| C    | 0.682324  | -3.762241 | 1.110200  | 0.687506  | -3.927318 | 1.050736  |
| H    | 1.337475  | -3.874814 | 1.965971  | 1.350364  | -4.132978 | 1.896082  |
| C    | 1.128178  | -3.426156 | -0.261651 | 1.139585  | -3.446821 | -0.293499 |
| H    | 2.164737  | -3.388126 | -0.580085 | 2.186309  | -3.388662 | -0.611403 |
| F    | 1.330915  | 0.000000  | 0.099666  | 1.325176  | 0.000000  | 0.227035  |
| F    | -1.330915 | 0.000000  | 0.099666  | -1.325176 | 0.000000  | 0.227035  |
| Pd   | 0.000000  | 1.579661  | -0.105717 | 0.000000  | 1.590346  | -0.094961 |
| Pd   | 0.000000  | -1.579661 | -0.105717 | 0.000000  | -1.590346 | -0.094961 |

Table S10 Theoretical cartesian coordinates (in Å) of Cp<sub>2</sub>Pd<sub>2</sub>F<sub>2</sub> **2F-4S** using the MPW1PW91 and BP86 methods

| Atom | MPW1PW91  |           |           | BP86      |           |           |
|------|-----------|-----------|-----------|-----------|-----------|-----------|
|      | X         | Y         | Z         | X         | Y         | Z         |
| Pd   | -1.141278 | 0.109160  | -0.092188 | -1.160200 | 0.117306  | -0.081640 |
| Pd   | 1.997890  | -0.708242 | -0.179344 | 2.024278  | -0.702975 | -0.177906 |
| C    | -3.451986 | 0.310730  | -0.332702 | -3.484137 | 0.338041  | -0.333811 |
| C    | -2.972006 | 0.206118  | 1.031237  | -3.020186 | 0.212752  | 1.046908  |
| C    | -2.590372 | -1.176278 | 1.277477  | -2.631687 | -1.183617 | 1.276360  |
| C    | -3.112191 | -0.885275 | -0.962706 | -3.166347 | -0.874846 | -0.979621 |
| C    | -2.593813 | -1.816441 | 0.045584  | -2.655203 | -1.825352 | 0.026756  |
| C    | 0.239084  | 1.197341  | 1.169242  | 0.207739  | 1.211230  | 1.167322  |
| C    | 1.663291  | 1.054489  | 0.753793  | 1.659223  | 1.039151  | 0.810905  |
| C    | 1.832723  | 2.015829  | -0.348013 | 1.895899  | 1.962742  | -0.320908 |
| C    | -0.361570 | 2.153964  | 0.305399  | -0.346118 | 2.168925  | 0.232762  |
| C    | 0.640266  | 2.613330  | -0.642105 | 0.707285  | 2.576793  | -0.689369 |
| F    | 0.375064  | -0.447724 | -1.382801 | 0.368290  | -0.485043 | -1.383089 |
| H    | 2.774884  | 2.182518  | -0.859715 | 2.875692  | 2.121246  | -0.783242 |
| H    | 2.414141  | 0.996702  | 1.545456  | 2.390431  | 0.953440  | 1.632474  |
| H    | 0.451162  | 3.315525  | -1.446588 | 0.565566  | 3.257223  | -1.535044 |
| H    | -0.084765 | 0.982534  | 2.183201  | -0.139872 | 1.072973  | 2.198187  |
| H    | -1.280988 | 2.694087  | 0.514260  | -1.258675 | 2.754126  | 0.400055  |
| H    | -3.869700 | 1.195166  | -0.797018 | -3.896488 | 1.238566  | -0.795450 |
| H    | -3.236222 | -1.115304 | -2.014752 | -3.296403 | -1.095186 | -2.043258 |
| H    | -2.266270 | -2.829874 | -0.155553 | -2.332545 | -2.849131 | -0.183395 |
| H    | -3.108523 | 0.959226  | 1.800775  | -3.158258 | 0.965010  | 1.831174  |
| H    | -2.249161 | -1.582874 | 2.221310  | -2.290730 | -1.606474 | 2.224573  |
| F    | 3.546128  | -1.028140 | 0.906783  | 3.608920  | -1.028946 | 0.890778  |

Table S11 Theoretical cartesian coordinates (in Å) of Cp<sub>2</sub>Pd<sub>2</sub>Cl<sub>2</sub> **2Cl-1S** using the MPW1PW91 and BP86 methods

| Atom | MPW1PW91  |           |           | BP86      |           |           |
|------|-----------|-----------|-----------|-----------|-----------|-----------|
|      | X         | Y         | Z         | X         | Y         | Z         |
| Pd   | 0.000000  | 1.246665  | -0.034157 | 0.000000  | 1.271595  | -0.029346 |
| Pd   | 0.000000  | -1.246665 | -0.034157 | 0.000000  | -1.271595 | -0.029346 |
| C    | -1.865092 | 0.734238  | 1.008018  | -1.840509 | 0.742793  | 1.054577  |
| C    | -1.865092 | -0.734238 | 1.008018  | -1.840509 | -0.742793 | 1.054577  |
| C    | -2.166580 | -1.169006 | -0.320331 | -2.213836 | -1.177503 | -0.272007 |
| C    | -2.166580 | 1.169006  | -0.320331 | -2.213836 | 1.177503  | -0.272007 |
| C    | -2.265057 | 0.000000  | -1.136182 | -2.377294 | 0.000000  | -1.084499 |
| C    | 1.865092  | 0.734238  | 1.008018  | 1.840509  | 0.742793  | 1.054577  |
| C    | 1.865092  | -0.734238 | 1.008018  | 1.840509  | -0.742793 | 1.054577  |
| C    | 2.166580  | -1.169006 | -0.320331 | 2.213836  | -1.177503 | -0.272007 |
| C    | 2.166580  | 1.169006  | -0.320331 | 2.213836  | 1.177503  | -0.272007 |
| C    | 2.265057  | 0.000000  | -1.136182 | 2.377294  | 0.000000  | -1.084499 |
| H    | 2.402435  | -2.184000 | -0.619818 | 2.466020  | -2.202368 | -0.560592 |
| H    | 1.917929  | -1.349314 | 1.899795  | 1.874153  | -1.359162 | 1.959008  |
| H    | 2.425506  | 0.000000  | -2.209459 | 2.598668  | 0.000000  | -2.156944 |
| H    | 1.917929  | 1.349314  | 1.899795  | 1.874153  | 1.359162  | 1.959008  |
| H    | 2.402435  | 2.184000  | -0.619818 | 2.466020  | 2.202368  | -0.560592 |
| H    | -1.917929 | 1.349314  | 1.899795  | -1.874153 | 1.359162  | 1.959008  |
| H    | -2.402435 | 2.184000  | -0.619818 | -2.466020 | 2.202368  | -0.560592 |
| H    | -2.425506 | 0.000000  | -2.209459 | -2.598668 | 0.000000  | -2.156944 |
| H    | -1.917929 | -1.349314 | 1.899795  | -1.874153 | -1.359162 | 1.959008  |
| H    | -2.402435 | -2.184000 | -0.619818 | -2.466020 | -2.202368 | -0.560592 |
| Cl   | 0.000000  | -3.630152 | -0.012613 | 0.000000  | -3.667407 | -0.127871 |
| Cl   | 0.000000  | 3.630152  | -0.012613 | 0.000000  | 3.667407  | -0.127871 |

Table S12 Theoretical cartesian coordinates (in Å) of Cp<sub>2</sub>Pd<sub>2</sub>Cl<sub>2</sub> **2Cl-2S** using the MPW1PW91 and BP86 methods

| Atom | MPW1PW91  |           |           | BP86      |           |           |
|------|-----------|-----------|-----------|-----------|-----------|-----------|
|      | X         | Y         | Z         | X         | Y         | Z         |
| C    | 0.000000  | 3.526764  | 1.308574  | 0.000000  | 3.300713  | 1.465275  |
| H    | 0.000000  | 3.366565  | 2.379129  | 0.000000  | 2.977756  | 2.509259  |
| C    | 1.129275  | 3.536664  | 0.444463  | 1.141361  | 3.469790  | 0.605476  |
| H    | 2.165410  | 3.471713  | 0.758924  | 2.187417  | 3.362056  | 0.911008  |
| C    | 0.684730  | 3.924331  | -0.909977 | 0.689787  | 4.112567  | -0.664376 |
| H    | 1.339551  | 4.075112  | -1.759760 | 1.351383  | 4.425410  | -1.476907 |
| C    | -0.684730 | 3.924331  | -0.909977 | -0.689787 | 4.112567  | -0.664376 |
| H    | -1.339551 | 4.075112  | -1.759760 | -1.351383 | 4.425410  | -1.476907 |
| C    | -1.129275 | 3.536664  | 0.444463  | -1.141361 | 3.469790  | 0.605476  |
| H    | -2.165410 | 3.471713  | 0.758924  | -2.187417 | 3.362056  | 0.911008  |
| C    | -0.684730 | -3.924331 | -0.909977 | -0.689787 | -4.112567 | -0.664376 |
| H    | -1.339551 | -4.075112 | -1.759760 | -1.351383 | -4.425410 | -1.476907 |
| C    | -1.129275 | -3.536664 | 0.444463  | -1.141361 | -3.469790 | 0.605476  |
| H    | -2.165410 | -3.471713 | 0.758924  | -2.187417 | -3.362056 | 0.911008  |
| C    | 0.000000  | -3.526764 | 1.308574  | 0.000000  | -3.300713 | 1.465275  |
| H    | 0.000000  | -3.366565 | 2.379129  | 0.000000  | -2.977756 | 2.509259  |
| C    | 1.129275  | -3.536664 | 0.444463  | 1.141361  | -3.469790 | 0.605476  |
| H    | 2.165410  | -3.471713 | 0.758924  | 2.187417  | -3.362056 | 0.911008  |
| C    | 0.684730  | -3.924331 | -0.909977 | 0.689787  | -4.112567 | -0.664376 |
| H    | 1.339551  | -4.075112 | -1.759760 | 1.351383  | -4.425410 | -1.476907 |
| Pd   | 0.000000  | 1.695517  | 0.049605  | 0.000000  | 1.667431  | 0.009355  |
| Pd   | 0.000000  | -1.695517 | 0.049605  | 0.000000  | -1.667431 | 0.009355  |
| Cl   | -1.666177 | 0.000000  | -0.289680 | -1.646471 | 0.000000  | -0.581921 |
| Cl   | 1.666177  | 0.000000  | -0.289680 | 1.646471  | 0.000000  | -0.581921 |



Table S13 Theoretical cartesian coordinates (in Å) of  $\text{Cp}_2\text{Pd}_2\text{Cl}_2$  **2Cl-3S** using the MPW1PW91 and BP86 methods

| Atom | MPW1PW91  |           |           | BP86      |           |           |
|------|-----------|-----------|-----------|-----------|-----------|-----------|
|      | X         | Y         | Z         | X         | Y         | Z         |
| Pd   | -1.002096 | 1.214596  | -0.292838 | -1.032902 | 1.200858  | -0.287053 |
| Pd   | 0.851083  | -0.458743 | -0.122732 | 0.875030  | -0.449211 | -0.124249 |
| C    | 1.188902  | 2.529926  | -0.373541 | 1.065822  | 2.611250  | -0.360972 |
| C    | 2.152267  | 1.544471  | -0.089775 | 2.082174  | 1.645469  | -0.112797 |
| C    | 1.850492  | 0.975524  | 1.204841  | 1.833315  | 1.046922  | 1.192409  |
| C    | 0.282751  | 2.612735  | 0.748445  | 0.181586  | 2.652212  | 0.798277  |
| C    | 0.686937  | 1.638061  | 1.708523  | 0.649904  | 1.672927  | 1.743505  |
| C    | -1.501129 | -0.270846 | -1.786172 | -1.491908 | -0.279168 | -1.804938 |
| C    | -0.412424 | -1.272143 | -1.701765 | -0.368903 | -1.260739 | -1.734311 |
| C    | -0.579617 | -2.022123 | -0.526617 | -0.522735 | -2.047770 | -0.556178 |
| C    | -2.337162 | -0.413697 | -0.660750 | -2.335568 | -0.465308 | -0.664322 |
| C    | -1.922681 | -1.670739 | 0.076901  | -1.890577 | -1.742220 | 0.046152  |
| H    | -0.077260 | -2.958846 | -0.310268 | -0.004843 | -2.993570 | -0.365774 |
| H    | 0.252890  | -1.520492 | -2.522322 | 0.298250  | -1.488623 | -2.572833 |
| H    | -2.635264 | -2.476731 | -0.146898 | -2.592366 | -2.568721 | -0.189918 |
| H    | -1.745644 | 0.259904  | -2.702492 | -1.760512 | 0.251079  | -2.727368 |
| H    | -3.360037 | -0.051057 | -0.596418 | -3.381548 | -0.138415 | -0.603132 |
| H    | 1.179513  | 3.174611  | -1.245325 | 1.017282  | 3.278335  | -1.227161 |
| H    | -0.401857 | 3.436203  | 0.946026  | -0.534679 | 3.453912  | 1.026023  |
| H    | 0.250112  | 1.488319  | 2.688301  | 0.233469  | 1.485089  | 2.736460  |
| H    | 3.018516  | 1.301310  | -0.694007 | 2.953117  | 1.449189  | -0.744460 |
| H    | 2.514361  | 0.340291  | 1.781354  | 2.547377  | 0.436976  | 1.755605  |
| Cl   | -1.939329 | -1.533176 | 1.860536  | -1.922310 | -1.648910 | 1.863089  |
| Cl   | 2.615874  | -1.976809 | -0.077141 | 2.702775  | -1.924177 | -0.065942 |

Table S14 Theoretical cartesian coordinates (in Å) of Cp<sub>2</sub>Pd<sub>2</sub>Cl<sub>2</sub> **2Cl-4S** using the MPW1PW91 and BP86 methods

| Atom | MPW1PW91  |           |           | BP86      |           |           |
|------|-----------|-----------|-----------|-----------|-----------|-----------|
|      | X         | Y         | Z         | X         | Y         | Z         |
| Pd   | 1.357804  | 0.106505  | 0.006480  | 1.324477  | 0.122295  | -0.011306 |
| Pd   | -1.892435 | -0.471990 | 0.336428  | -1.841936 | -0.449884 | 0.355092  |
| C    | 3.688579  | 0.068980  | -0.088505 | 3.669960  | 0.022908  | -0.082693 |
| C    | 3.036645  | -0.203032 | -1.351834 | 3.032619  | -0.299667 | -1.356142 |
| C    | 2.462282  | -1.535617 | -1.300090 | 2.410237  | -1.619308 | -1.244266 |
| C    | 3.296949  | -0.948649 | 0.783272  | 3.257357  | -0.966482 | 0.836898  |
| C    | 2.547966  | -1.956256 | 0.021973  | 2.486683  | -1.994987 | 0.108940  |
| C    | -0.089852 | 1.088137  | -1.287669 | -0.110203 | 1.062251  | -1.352977 |
| C    | -1.467330 | 1.192119  | -0.726242 | -1.500274 | 1.200530  | -0.807012 |
| C    | -1.406973 | 2.335759  | 0.210708  | -1.449797 | 2.382153  | 0.094126  |
| C    | 0.692343  | 2.110605  | -0.694301 | 0.688221  | 2.113522  | -0.769540 |
| C    | -0.149205 | 2.850185  | 0.242827  | -0.171599 | 2.895489  | 0.127413  |
| H    | -2.254530 | 2.676831  | 0.795436  | -2.312375 | 2.755037  | 0.655534  |
| H    | -2.267480 | 1.194602  | -1.472043 | -2.323792 | 1.127292  | -1.538738 |
| H    | 0.197984  | 3.668547  | 0.864226  | 0.171954  | 3.740125  | 0.733481  |
| H    | 0.092841  | 0.644571  | -2.261466 | 0.071413  | 0.600727  | -2.330175 |
| H    | 1.616025  | 2.507373  | -1.107072 | 1.616109  | 2.507537  | -1.202517 |
| H    | 4.262552  | 0.953081  | 0.158330  | 4.267271  | 0.911785  | 0.133749  |
| H    | 3.529423  | -1.016570 | 1.839753  | 3.484333  | -0.992714 | 1.906575  |
| H    | 2.133196  | -2.866668 | 0.438363  | 2.043435  | -2.885857 | 0.562484  |
| H    | 3.141015  | 0.395370  | -2.251293 | 3.165201  | 0.258282  | -2.289418 |
| H    | 1.955831  | -2.042274 | -2.111988 | 1.890043  | -2.153364 | -2.043132 |
| Cl   | -3.620635 | -1.014441 | -1.034340 | -3.538328 | -1.179707 | -0.994503 |
| Cl   | -0.113617 | -0.121790 | 1.885702  | -0.117537 | 0.028047  | 1.951532  |

Table S15 Theoretical cartesian coordinates (in Å) of  $\text{Cp}_2\text{Pd}_2(\text{CN})_2$  **2CN-1S** using the MPW1PW91 and BP86 methods

| Atom | MPW1PW91  |           |           | BP86      |           |           |
|------|-----------|-----------|-----------|-----------|-----------|-----------|
|      | X         | Y         | Z         | X         | Y         | Z         |
| Pd   | -1.362290 | 0.710164  | -0.347421 | -1.386273 | 0.675361  | -0.341473 |
| Pd   | 0.997533  | -0.170754 | -0.190669 | 1.022199  | -0.137675 | -0.191284 |
| C    | -0.503532 | 2.611965  | 0.254782  | -0.653421 | 2.626994  | 0.319632  |
| C    | 0.704795  | 2.555275  | -0.499118 | 0.568738  | 2.665828  | -0.441024 |
| C    | 1.686939  | 1.867403  | 0.268037  | 1.589489  | 1.973746  | 0.292729  |
| C    | -0.277183 | 1.913819  | 1.502364  | -0.400039 | 1.855672  | 1.531839  |
| C    | 1.061975  | 1.465847  | 1.515421  | 0.980763  | 1.462302  | 1.521970  |
| C    | -1.366872 | -1.012718 | -1.659728 | -1.336986 | -1.029311 | -1.693470 |
| C    | 0.004758  | -1.554432 | -1.578063 | 0.061304  | -1.527942 | -1.631720 |
| C    | 0.180652  | -2.181011 | -0.334243 | 0.271418  | -2.182132 | -0.384219 |
| C    | -2.046807 | -1.309004 | -0.462431 | -2.005890 | -1.373697 | -0.478039 |
| C    | -1.172028 | -2.247258 | 0.366211  | -1.089763 | -2.323725 | 0.320591  |
| H    | 0.976677  | -2.877585 | -0.096227 | 1.093217  | -2.873414 | -0.173211 |
| H    | 0.672334  | -1.648816 | -2.428830 | 0.729639  | -1.586432 | -2.498025 |
| H    | -1.556476 | -3.275650 | 0.250621  | -1.444257 | -3.369580 | 0.157939  |
| H    | -1.826311 | -0.711554 | -2.597126 | -1.820305 | -0.730207 | -2.631740 |
| H    | -3.127827 | -1.329716 | -0.350921 | -3.095118 | -1.446253 | -0.365711 |
| H    | -1.327020 | 3.293731  | 0.050277  | -1.515594 | 3.285675  | 0.148899  |
| H    | -0.965380 | 1.846830  | 2.337703  | -1.080241 | 1.730714  | 2.379730  |
| H    | 1.566016  | 1.002716  | 2.355947  | 1.515220  | 1.006544  | 2.360754  |
| H    | 0.872738  | 3.026389  | -1.460355 | 0.710669  | 3.186027  | -1.392428 |
| H    | 2.752878  | 1.866119  | 0.071001  | 2.663660  | 2.028687  | 0.092561  |
| C    | -1.158253 | -1.962836 | 1.803304  | -1.085000 | -2.101488 | 1.777057  |
| N    | -1.175847 | -1.754796 | 2.946920  | -1.109688 | -1.941281 | 2.945357  |
| C    | 2.825296  | -0.879712 | -0.096606 | 2.885260  | -0.760706 | -0.093632 |
| N    | 3.904811  | -1.332259 | -0.069710 | 4.006156  | -1.155656 | -0.062817 |

Table S16 Theoretical cartesian coordinates (in Å) of  $\text{Cp}_2\text{Pd}_2(\text{CN})_2$  **2CN-2S** using the MPW1PW91 and BP86 methods

| Atom | MPW1PW91  |           |           | BP86      |           |           |
|------|-----------|-----------|-----------|-----------|-----------|-----------|
|      | X         | Y         | Z         | X         | Y         | Z         |
| C    | 1.332448  | -3.724373 | -0.084361 | 1.358800  | -3.820703 | -0.028102 |
| H    | 2.399966  | -3.595175 | -0.224145 | 2.443067  | -3.702827 | -0.120652 |
| C    | 0.674980  | -3.918314 | 1.206644  | 0.633526  | -3.999658 | 1.239002  |
| H    | 1.150018  | -3.830001 | 2.175598  | 1.066057  | -3.915432 | 2.238719  |
| C    | -0.674980 | -4.092740 | 0.948016  | -0.720952 | -4.158177 | 0.911637  |
| H    | -1.469180 | -4.174413 | 1.680701  | -1.556979 | -4.228745 | 1.613248  |
| C    | -0.867509 | -4.103907 | -0.503587 | -0.846324 | -4.184376 | -0.559407 |
| H    | -1.823311 | -4.226797 | -1.000172 | -1.787510 | -4.298243 | -1.105409 |
| C    | 0.383633  | -4.017868 | -1.128658 | 0.443293  | -4.094317 | -1.129491 |
| H    | 0.583231  | -4.022331 | -2.192425 | 0.696089  | -4.097675 | -2.192062 |
| C    | 0.867509  | 4.103907  | -0.503587 | 0.846323  | 4.184376  | -0.559407 |
| H    | 1.823311  | 4.226797  | -1.000172 | 1.787510  | 4.298244  | -1.105408 |
| C    | 0.674980  | 4.092740  | 0.948016  | 0.720952  | 4.158177  | 0.911637  |
| H    | 1.469180  | 4.174413  | 1.680701  | 1.556979  | 4.228745  | 1.613248  |
| C    | -0.674980 | 3.918314  | 1.206644  | -0.633526 | 3.999658  | 1.239002  |
| H    | -1.150018 | 3.830001  | 2.175598  | -1.066057 | 3.915432  | 2.238719  |
| C    | -1.332448 | 3.724373  | -0.084361 | -1.358800 | 3.820702  | -0.028102 |
| H    | -2.399966 | 3.595175  | -0.224145 | -2.443067 | 3.702826  | -0.120652 |
| C    | -0.383633 | 4.017868  | -1.128658 | -0.443293 | 4.094317  | -1.129491 |
| H    | -0.583231 | 4.022331  | -2.192425 | -0.696089 | 4.097675  | -2.192062 |
| C    | 1.211117  | -0.450102 | -0.054133 | 1.207748  | -0.484566 | -0.051289 |
| N    | 1.644688  | 0.649204  | -0.061489 | 1.548317  | 0.667246  | -0.066977 |
| Pd   | -0.034917 | 1.993954  | -0.050275 | -0.078264 | 2.043843  | -0.037504 |
| Pd   | 0.034917  | -1.993954 | -0.050275 | 0.078264  | -2.043843 | -0.037504 |
| N    | -1.644688 | -0.649204 | -0.061489 | -1.548317 | -0.667245 | -0.066977 |
| C    | -1.211117 | 0.450102  | -0.054133 | -1.207748 | 0.484566  | -0.051289 |

Table S17 Theoretical cartesian coordinates (in Å) of  $\text{Cp}_2\text{Pd}_2(\text{CN})_2$  **2CN-3S** using the MPW1PW91 and BP86 methods

| Atom | MPW1PW91  |           |           | BP86      |           |           |
|------|-----------|-----------|-----------|-----------|-----------|-----------|
|      | X         | Y         | Z         | X         | Y         | Z         |
| C    | -0.276069 | 4.039208  | 1.136666  | -0.266224 | 4.098216  | 1.147741  |
| H    | -0.600226 | 4.048037  | 2.171067  | -0.593769 | 4.105723  | 2.191690  |
| C    | 1.113554  | 4.074860  | 0.694858  | 1.136135  | 4.120361  | 0.702026  |
| H    | 1.979666  | 4.044570  | 1.344559  | 2.009807  | 4.082862  | 1.357795  |
| C    | 1.113554  | 4.074860  | -0.694858 | 1.136135  | 4.120361  | -0.702026 |
| H    | 1.979666  | 4.044570  | -1.344559 | 2.009807  | 4.082862  | -1.357795 |
| C    | -0.276069 | 4.039208  | -1.136666 | -0.266224 | 4.098216  | -1.147741 |
| H    | -0.600226 | 4.048037  | -2.171067 | -0.593769 | 4.105723  | -2.191690 |
| C    | -1.118652 | 4.161579  | 0.000000  | -1.117224 | 4.218652  | 0.000000  |
| H    | -2.200235 | 4.202284  | 0.000000  | -2.208489 | 4.263046  | 0.000000  |
| C    | -0.241591 | -3.967390 | 1.129624  | -0.215657 | -4.019590 | 1.142427  |
| H    | -0.561760 | -3.950076 | 2.165687  | -0.539327 | -4.008724 | 2.188199  |
| C    | 1.159712  | -4.089102 | 0.686790  | 1.196118  | -4.165912 | 0.692795  |
| H    | 2.022583  | -4.078077 | 1.341611  | 2.067229  | -4.167669 | 1.353518  |
| C    | 1.159712  | -4.089102 | -0.686790 | 1.196118  | -4.165912 | -0.692795 |
| H    | 2.022583  | -4.078077 | -1.341611 | 2.067229  | -4.167669 | -1.353518 |
| C    | -0.241591 | -3.967390 | -1.129624 | -0.215657 | -4.019590 | -1.142427 |
| H    | -0.561760 | -3.950076 | -2.165687 | -0.539327 | -4.008724 | -2.188199 |
| C    | -1.092231 | -4.111423 | 0.000000  | -1.078671 | -4.144055 | 0.000000  |
| H    | -2.174174 | -4.140604 | 0.000000  | -2.170676 | -4.173418 | 0.000000  |
| C    | -0.064391 | 0.549865  | 1.202048  | -0.075206 | 0.571906  | 1.190360  |
| N    | -0.074149 | -0.589386 | 1.493337  | -0.091455 | -0.595166 | 1.442411  |
| Pd   | -0.112145 | -2.087941 | 0.000000  | -0.138403 | -2.117718 | 0.000000  |
| Pd   | -0.046492 | 2.098172  | 0.000000  | -0.043226 | 2.128826  | 0.000000  |
| N    | -0.074149 | -0.589386 | -1.493337 | -0.091455 | -0.595166 | -1.442411 |
| C    | -0.064391 | 0.549865  | -1.202048 | -0.075206 | 0.571906  | -1.190360 |

Table S18 Theoretical cartesian coordinates (in Å) of  $\text{Cp}_2\text{Pd}_2(\text{CN})_2$  **2CN-4S** using the MPW1PW91 and BP86 methods

| Atom | MPW1PW91  |           |           | BP86      |           |           |
|------|-----------|-----------|-----------|-----------|-----------|-----------|
|      | X         | Y         | Z         | X         | Y         | Z         |
| C    | 3.577631  | -0.735637 | 0.026699  | 3.649053  | -0.486897 | 0.008754  |
| H    | 3.939073  | -1.635478 | -0.458712 | 4.171323  | -1.191614 | -0.645539 |
| C    | 3.569421  | 0.562115  | -0.529579 | 3.422872  | 0.890299  | -0.254021 |
| H    | 3.860609  | 0.844410  | -1.532899 | 3.690841  | 1.443991  | -1.156258 |
| C    | 2.876437  | 1.375765  | 0.418274  | 2.586428  | 1.367535  | 0.830320  |
| H    | 2.630798  | 2.423452  | 0.285907  | 2.189097  | 2.383504  | 0.916853  |
| C    | 2.779658  | 0.639946  | 1.693199  | 2.556917  | 0.342878  | 1.895474  |
| H    | 2.362377  | 1.035300  | 2.611068  | 2.048911  | 0.443745  | 2.857662  |
| C    | 3.179389  | -0.649061 | 1.447696  | 3.160052  | -0.800681 | 1.377338  |
| H    | 3.148591  | -1.487579 | 2.133082  | 3.231623  | -1.781751 | 1.855023  |
| C    | -2.971304 | -0.073927 | 1.646373  | -2.758225 | 0.465993  | 1.753654  |
| H    | -2.650498 | -0.245546 | 2.665605  | -2.347770 | 0.787864  | 2.714258  |
| C    | -3.276872 | -1.072437 | 0.673632  | -3.073357 | -0.849428 | 1.372007  |
| H    | -3.322187 | -2.140709 | 0.853915  | -2.978691 | -1.752447 | 1.980753  |
| C    | -3.739837 | -0.407996 | -0.549439 | -3.533269 | -0.812273 | -0.031478 |
| H    | -4.092405 | -0.910608 | -1.441503 | -3.879450 | -1.678467 | -0.603426 |
| C    | -3.548473 | 0.952416  | -0.375650 | -3.580182 | 0.554585  | -0.459156 |
| H    | -3.703611 | 1.730409  | -1.113046 | -3.887341 | 0.920241  | -1.441251 |
| C    | -2.990190 | 1.160261  | 0.958551  | -2.977604 | 1.327697  | 0.588899  |
| H    | -2.731643 | 2.127392  | 1.374419  | -2.790727 | 2.404952  | 0.553930  |
| Pd   | 1.441937  | -0.112942 | -0.255329 | 1.385044  | -0.126143 | -0.249016 |
| Pd   | -1.421233 | -0.146824 | -0.074768 | -1.378147 | -0.156591 | -0.171667 |
| C    | -0.209483 | -1.579688 | -0.606465 | -0.192484 | -1.563186 | -0.812769 |
| N    | 0.714481  | -2.242798 | -0.945137 | 0.742220  | -2.198934 | -1.238622 |
| C    | -0.040607 | 1.317125  | -0.740012 | -0.024685 | 1.249684  | -0.999205 |
| N    | -0.089925 | 2.424921  | -1.136729 | -0.053391 | 2.328720  | -1.518450 |

Table S19 Theoretical cartesian coordinates (in Å) of  $\text{Cp}_2\text{Pd}_2(\text{CN})_2$  **2CN-5S** using the MPW1PW91 and BP86 methods

| Atom | MPW1PW91  |           |           | BP86      |           |           |
|------|-----------|-----------|-----------|-----------|-----------|-----------|
|      | X         | Y         | Z         | X         | Y         | Z         |
| C    | 0.000000  | 3.446730  | -1.020380 | 0.000000  | 3.494120  | -0.931138 |
| H    | 0.000000  | 3.530772  | -2.099216 | 0.000000  | 3.626253  | -2.015086 |
| C    | -1.130790 | 3.268964  | -0.180745 | -1.142955 | 3.293091  | -0.088465 |
| H    | -2.167006 | 3.265724  | -0.500278 | -2.188668 | 3.308995  | -0.411185 |
| C    | -0.688062 | 3.283271  | 1.224745  | -0.695012 | 3.246765  | 1.327635  |
| H    | -1.344770 | 3.219767  | 2.083690  | -1.357596 | 3.147843  | 2.191308  |
| C    | 0.688062  | 3.283271  | 1.224745  | 0.695012  | 3.246765  | 1.327635  |
| H    | 1.344770  | 3.219767  | 2.083690  | 1.357596  | 3.147843  | 2.191308  |
| C    | 1.130790  | 3.268964  | -0.180745 | 1.142955  | 3.293091  | -0.088465 |
| H    | 2.167006  | 3.265724  | -0.500278 | 2.188668  | 3.308995  | -0.411185 |
| C    | 1.130790  | -3.268964 | -0.180745 | 1.142955  | -3.293091 | -0.088465 |
| H    | 2.167006  | -3.265724 | -0.500278 | 2.188668  | -3.308995 | -0.411185 |
| C    | 0.000000  | -3.446730 | -1.020380 | 0.000000  | -3.494120 | -0.931138 |
| H    | 0.000000  | -3.530772 | -2.099216 | 0.000000  | -3.626253 | -2.015086 |
| C    | -1.130790 | -3.268964 | -0.180745 | -1.142955 | -3.293091 | -0.088465 |
| H    | -2.167006 | -3.265724 | -0.500278 | -2.188668 | -3.308995 | -0.411185 |
| C    | -0.688062 | -3.283271 | 1.224745  | -0.695012 | -3.246765 | 1.327635  |
| H    | -1.344770 | -3.219767 | 2.083690  | -1.357596 | -3.147843 | 2.191308  |
| C    | 0.688062  | -3.283271 | 1.224745  | 0.695012  | -3.246765 | 1.327635  |
| H    | 1.344770  | -3.219767 | 2.083690  | 1.357596  | -3.147843 | 2.191308  |
| Pd   | 0.000000  | 1.359434  | -0.100501 | 0.000000  | 1.352363  | -0.123934 |
| Pd   | 0.000000  | -1.359434 | -0.100501 | 0.000000  | -1.352363 | -0.123934 |
| C    | 1.590915  | 0.000000  | -0.195972 | 1.571258  | 0.000000  | -0.332737 |
| N    | 2.769185  | 0.000000  | -0.239206 | 2.766507  | 0.000000  | -0.447286 |
| C    | -1.590915 | 0.000000  | -0.195972 | -1.571258 | 0.000000  | -0.332737 |
| N    | -2.769185 | 0.000000  | -0.239206 | -2.766507 | 0.000000  | -0.447286 |

Table S20 Theoretical cartesian coordinates (in Å) of  $\text{Cp}_2\text{Pd}_2(\text{CN})_2$  **2CN-6S** using the MPW1PW91 and BP86 methods

| Atom | MPW1PW91  |           |           | BP86      |           |           |
|------|-----------|-----------|-----------|-----------|-----------|-----------|
|      | X         | Y         | Z         | X         | Y         | Z         |
| Pd   | -0.016624 | 1.258825  | 0.000000  | -0.015074 | 1.285314  | 0.000000  |
| Pd   | 0.016624  | -1.258825 | 0.000000  | 0.015074  | -1.285314 | 0.000000  |
| C    | -2.153936 | 1.362491  | 0.000000  | -2.169199 | 1.405800  | 0.000000  |
| C    | -2.007998 | 0.516360  | 1.142158  | -2.029639 | 0.550485  | 1.153997  |
| C    | -2.007998 | -0.872226 | 0.713472  | -2.029639 | -0.850204 | 0.720518  |
| C    | -2.007998 | 0.516360  | -1.142158 | -2.029639 | 0.550485  | -1.153997 |
| C    | -2.007998 | -0.872226 | -0.713472 | -2.029639 | -0.850204 | -0.720518 |
| C    | 2.007998  | 0.872226  | 0.713472  | 2.029639  | 0.850204  | 0.720518  |
| C    | 2.007998  | -0.516360 | 1.142158  | 2.029639  | -0.550485 | 1.153997  |
| C    | 2.153936  | -1.362491 | 0.000000  | 2.169199  | -1.405800 | 0.000000  |
| C    | 2.007998  | 0.872226  | -0.713472 | 2.029639  | 0.850204  | -0.720518 |
| C    | 2.007998  | -0.516360 | -1.142158 | 2.029639  | -0.550485 | -1.153997 |
| H    | 2.405180  | -2.415780 | 0.000000  | 2.426941  | -2.467994 | 0.000000  |
| H    | 2.051996  | -0.846574 | 2.174438  | 2.074202  | -0.883711 | 2.195756  |
| H    | 2.051996  | -0.846574 | -2.174438 | 2.074202  | -0.883711 | -2.195756 |
| H    | 2.255247  | 1.713702  | 1.350672  | 2.289973  | 1.697426  | 1.362083  |
| H    | 2.255247  | 1.713702  | -1.350672 | 2.289973  | 1.697426  | -1.362083 |
| H    | -2.405180 | 2.415780  | 0.000000  | -2.426941 | 2.467994  | 0.000000  |
| H    | -2.051996 | 0.846574  | -2.174438 | -2.074202 | 0.883711  | -2.195756 |
| H    | -2.255247 | -1.713702 | -1.350672 | -2.289973 | -1.697426 | -1.362083 |
| H    | -2.051996 | 0.846574  | 2.174438  | -2.074202 | 0.883711  | 2.195756  |
| H    | -2.255247 | -1.713702 | 1.350672  | -2.289973 | -1.697426 | 1.362083  |
| C    | -0.119783 | -3.300381 | 0.000000  | -0.154117 | -3.324622 | 0.000000  |
| N    | -0.209001 | -4.468326 | 0.000000  | -0.267220 | -4.507572 | 0.000000  |
| C    | 0.119783  | 3.300381  | 0.000000  | 0.154117  | 3.324622  | 0.000000  |
| N    | 0.209001  | 4.468326  | 0.000000  | 0.267220  | 4.507572  | 0.000000  |



Table S21 Theoretical cartesian coordinates (in Å) of Cp<sub>2</sub>Pd<sub>2</sub>(CO)<sub>2</sub> **2CO-1S** using the MPW1PW91 and BP86 methods

| Atom | MPW1PW91  |           |           | BP86      |           |           |
|------|-----------|-----------|-----------|-----------|-----------|-----------|
|      | X         | Y         | Z         | X         | Y         | Z         |
| C    | 0.000000  | 3.519354  | -0.808406 | 0.715824  | 3.488982  | -0.495932 |
| H    | 0.000000  | 3.742152  | -1.868014 | 1.365204  | 3.699974  | -1.349719 |
| C    | -1.145539 | 3.323734  | 0.017836  | -0.715824 | 3.488982  | -0.495932 |
| H    | -2.178346 | 3.391727  | -0.304412 | -1.365204 | 3.699974  | -1.349719 |
| C    | -0.702264 | 3.133165  | 1.377090  | -1.155245 | 3.188244  | 0.858572  |
| H    | -1.347140 | 2.987438  | 2.235464  | -2.197680 | 3.118455  | 1.183025  |
| C    | 0.702264  | 3.133165  | 1.377090  | 0.000000  | 3.060031  | 1.694816  |
| H    | 1.347140  | 2.987438  | 2.235464  | 0.000000  | 2.829669  | 2.763346  |
| C    | 1.145539  | 3.323734  | 0.017836  | 1.155245  | 3.188244  | 0.858572  |
| H    | 2.178346  | 3.391727  | -0.304412 | 2.197680  | 3.118455  | 1.183025  |
| C    | 0.702264  | -3.133165 | 1.377090  | 0.000000  | -3.060031 | 1.694816  |
| H    | 1.347140  | -2.987438 | 2.235464  | 0.000000  | -2.829669 | 2.763346  |
| C    | 1.145539  | -3.323734 | 0.017836  | 1.155245  | -3.188244 | 0.858572  |
| H    | 2.178346  | -3.391727 | -0.304412 | 2.197680  | -3.118455 | 1.183025  |
| C    | 0.000000  | -3.519354 | -0.808406 | 0.715824  | -3.488982 | -0.495932 |
| H    | 0.000000  | -3.742152 | -1.868014 | 1.365204  | -3.699974 | -1.349719 |
| C    | -1.145539 | -3.323734 | 0.017836  | -0.715824 | -3.488982 | -0.495932 |
| H    | -2.178346 | -3.391727 | -0.304412 | -1.365204 | -3.699974 | -1.349719 |
| C    | -0.702264 | -3.133165 | 1.377090  | -1.155245 | -3.188244 | 0.858572  |
| H    | -1.347140 | -2.987438 | 2.235464  | -2.197680 | -3.118455 | 1.183025  |
| Pd   | 0.000000  | 1.332066  | -0.096573 | 0.000000  | 1.333191  | -0.105135 |
| Pd   | 0.000000  | -1.332066 | -0.096573 | 0.000000  | -1.333191 | -0.105135 |
| C    | 1.433153  | 0.000000  | -0.500216 | 1.406502  | 0.000000  | -0.638347 |
| O    | 2.561729  | 0.000000  | -0.804889 | 2.528630  | 0.000000  | -1.035527 |
| C    | -1.433153 | 0.000000  | -0.500216 | -1.406502 | 0.000000  | -0.638347 |
| O    | -2.561729 | 0.000000  | -0.804889 | -2.528630 | 0.000000  | -1.035527 |

Table S22 Theoretical cartesian coordinates (in Å) of  $\text{Cp}_2\text{Pd}_2(\text{CO})_2$  **2CO-2S** using the MPW1PW91 and BP86 methods

| Atom | MPW1PW91  |           |           | BP86      |           |           |
|------|-----------|-----------|-----------|-----------|-----------|-----------|
|      | X         | Y         | Z         | X         | Y         | Z         |
| Pd   | 0.000000  | 0.000000  | 1.349508  | 0.000000  | 0.000000  | 1.372504  |
| Pd   | 0.000000  | 0.000000  | -1.349508 | 0.000000  | 0.000000  | -1.372504 |
| C    | 0.000000  | 2.174272  | 1.162291  | 0.000000  | 2.196095  | 1.172617  |
| C    | -0.818189 | 1.991653  | 0.000000  | -0.825491 | 1.990857  | 0.000000  |
| C    | 0.000000  | 2.174272  | -1.162291 | 0.000000  | 2.196095  | -1.172617 |
| C    | 1.345148  | 2.476152  | 0.686892  | 1.348835  | 2.525995  | 0.694460  |
| C    | 1.345148  | 2.476152  | -0.686892 | 1.348835  | 2.525995  | -0.694460 |
| C    | -1.345148 | -2.476152 | 0.686892  | -1.348835 | -2.525995 | 0.694460  |
| C    | -1.345148 | -2.476152 | -0.686892 | -1.348835 | -2.525995 | -0.694460 |
| C    | 0.000000  | -2.174272 | -1.162291 | 0.000000  | -2.196095 | -1.172617 |
| C    | 0.000000  | -2.174272 | 1.162291  | 0.000000  | -2.196095 | 1.172617  |
| C    | 0.818189  | -1.991653 | 0.000000  | 0.825491  | -1.990857 | 0.000000  |
| H    | 0.392305  | -2.527941 | -2.110661 | 0.402613  | -2.547647 | -2.129029 |
| H    | -2.203645 | -2.647587 | -1.327701 | -2.210464 | -2.716279 | -1.342650 |
| H    | 1.902906  | -1.978691 | 0.000000  | 1.919938  | -1.966678 | 0.000000  |
| H    | -2.203645 | -2.647587 | 1.327701  | -2.210464 | -2.716279 | 1.342650  |
| H    | 0.392305  | -2.527941 | 2.110661  | 0.402613  | -2.547647 | 2.129029  |
| H    | -0.392305 | 2.527941  | 2.110661  | -0.402613 | 2.547647  | 2.129029  |
| H    | 2.203645  | 2.647587  | 1.327701  | 2.210464  | 2.716279  | 1.342650  |
| H    | 2.203645  | 2.647587  | -1.327701 | 2.210464  | 2.716279  | -1.342650 |
| H    | -1.902906 | 1.978691  | 0.000000  | -1.919938 | 1.966678  | 0.000000  |
| H    | -0.392305 | 2.527941  | -2.110661 | -0.402613 | 2.547647  | -2.129029 |
| C    | 0.000000  | 0.000000  | 3.250107  | 0.000000  | 0.000000  | 3.265643  |
| O    | 0.000000  | 0.000000  | 4.398484  | 0.000000  | 0.000000  | 4.434940  |
| C    | 0.000000  | 0.000000  | -3.250107 | 0.000000  | 0.000000  | -3.265643 |
| O    | 0.000000  | 0.000000  | -4.398484 | 0.000000  | 0.000000  | -4.434940 |

Table S23 Theoretical cartesian coordinates (in Å) of  $\text{Cp}_2\text{Pd}_2(\text{CO})_2$  **2CO-3S** using the MPW1PW91 and BP86 methods

| Atom | MPW1PW91  |           |           | BP86      |           |           |
|------|-----------|-----------|-----------|-----------|-----------|-----------|
|      | X         | Y         | Z         | X         | Y         | Z         |
| C    | 2.551504  | 0.684649  | 1.049971  | 2.615627  | 0.692031  | 1.028178  |
| C    | 2.172123  | 1.163449  | -0.280617 | 2.194187  | 1.173752  | -0.300299 |
| C    | 1.965985  | 0.000000  | -1.089946 | 1.959371  | 0.000000  | -1.114467 |
| C    | 2.172123  | -1.163449 | -0.280617 | 2.194187  | -1.173752 | -0.300299 |
| C    | 2.551504  | -0.684649 | 1.049971  | 2.615627  | -0.692031 | 1.028178  |
| H    | 2.502379  | 2.113123  | -0.691231 | 2.515430  | 2.132513  | -0.723836 |
| H    | 1.904351  | 0.000000  | -2.172805 | 1.877155  | 0.000000  | -2.205957 |
| H    | 2.764585  | 1.324984  | 1.899568  | 2.854713  | 1.339830  | 1.877918  |
| H    | 2.502379  | -2.113123 | -0.691231 | 2.515430  | -2.132513 | -0.723836 |
| H    | 2.764585  | -1.324984 | 1.899568  | 2.854713  | -1.339830 | 1.877918  |
| C    | -2.551504 | 0.684649  | 1.049971  | -2.615627 | 0.692031  | 1.028178  |
| C    | -2.172123 | 1.163449  | -0.280617 | -2.194187 | 1.173752  | -0.300299 |
| C    | -1.965985 | 0.000000  | -1.089946 | -1.959371 | 0.000000  | -1.114467 |
| C    | -2.172123 | -1.163449 | -0.280617 | -2.194187 | -1.173752 | -0.300299 |
| C    | -2.551504 | -0.684649 | 1.049971  | -2.615627 | -0.692031 | 1.028178  |
| H    | -2.502379 | 2.113123  | -0.691231 | -2.515430 | 2.132513  | -0.723836 |
| H    | -1.904351 | 0.000000  | -2.172805 | -1.877155 | 0.000000  | -2.205957 |
| H    | -2.764585 | 1.324984  | 1.899568  | -2.854713 | 1.339830  | 1.877918  |
| H    | -2.502379 | -2.113123 | -0.691231 | -2.515430 | -2.132513 | -0.723836 |
| H    | -2.764585 | -1.324984 | 1.899568  | -2.854713 | -1.339830 | 1.877918  |
| Pd   | 0.000000  | 1.352706  | -0.195519 | 0.000000  | 1.376256  | -0.199222 |
| Pd   | 0.000000  | -1.352706 | -0.195519 | 0.000000  | -1.376256 | -0.199222 |
| C    | 0.000000  | 3.193767  | 0.257685  | 0.000000  | 3.197276  | 0.300537  |
| C    | 0.000000  | -3.193767 | 0.257685  | 0.000000  | -3.197276 | 0.300537  |
| O    | 0.000000  | 4.300461  | 0.563913  | 0.000000  | 4.312555  | 0.651378  |
| O    | 0.000000  | -4.300461 | 0.563913  | 0.000000  | -4.312555 | 0.651378  |

Table S24 Theoretical cartesian coordinates (in Å) of  $\text{Cp}_2\text{Pd}_2(\text{CO})_2$  **2CO-4S** using the MPW1PW91 and BP86 methods

| Atom | MPW1PW91  |           |           | BP86      |           |           |
|------|-----------|-----------|-----------|-----------|-----------|-----------|
|      | X         | Y         | Z         | X         | Y         | Z         |
| C    | -2.742213 | -1.488660 | 0.607864  | -2.715540 | -1.540816 | 0.652674  |
| C    | -3.263528 | -0.904915 | -0.606555 | -3.261308 | -0.952698 | -0.563494 |
| C    | -3.426823 | 0.468916  | -0.371710 | -3.443937 | 0.432843  | -0.315488 |
| C    | -3.061945 | 0.732783  | 1.010917  | -3.063259 | 0.695269  | 1.075893  |
| C    | -2.722126 | -0.486617 | 1.626774  | -2.684889 | -0.532015 | 1.682861  |
| H    | -2.517890 | -2.540208 | 0.748259  | -2.467520 | -2.598509 | 0.784532  |
| H    | -3.451263 | -1.431996 | -1.533875 | -3.462404 | -1.483286 | -1.497625 |
| H    | -3.790928 | 1.204033  | -1.080134 | -3.837975 | 1.171631  | -1.019445 |
| H    | -3.115620 | 1.701399  | 1.495560  | -3.120650 | 1.669609  | 1.570721  |
| H    | -2.409796 | -0.626433 | 2.654021  | -2.342766 | -0.672206 | 2.711058  |
| C    | 1.043770  | 1.705167  | -1.334327 | 1.090052  | 1.668128  | -1.309743 |
| C    | 2.140925  | 2.036104  | -0.534550 | 2.127110  | 2.084171  | -0.437960 |
| C    | 1.637808  | 2.412913  | 0.776680  | 1.505399  | 2.571600  | 0.793195  |
| C    | 0.258594  | 2.353526  | 0.760507  | 0.118271  | 2.494707  | 0.665402  |
| C    | -0.188512 | 1.884444  | -0.548955 | -0.215734 | 1.904071  | -0.637248 |
| H    | 1.067594  | 1.489203  | -2.396844 | 1.198206  | 1.411446  | -2.368638 |
| H    | 3.174174  | 2.092548  | -0.858685 | 3.189936  | 2.153529  | -0.689909 |
| H    | 2.256272  | 2.696928  | 1.621596  | 2.053637  | 2.931637  | 1.670186  |
| H    | -0.398694 | 2.604588  | 1.585059  | -0.613240 | 2.812862  | 1.414175  |
| H    | -1.063157 | 2.323476  | -1.031217 | -1.068053 | 2.271936  | -1.229652 |
| Pd   | 1.613219  | -0.159954 | -0.011392 | 1.651468  | -0.161873 | -0.011524 |
| Pd   | -1.135820 | -0.027982 | -0.158016 | -1.130074 | -0.042495 | -0.179668 |
| C    | 0.197843  | -1.405721 | -0.691567 | 0.206536  | -1.361497 | -0.798964 |
| C    | 2.939825  | -1.352281 | 0.646541  | 2.893590  | -1.387636 | 0.738156  |
| O    | 3.718252  | -2.114406 | 1.012458  | 3.641220  | -2.189071 | 1.146823  |
| O    | 0.207651  | -2.460898 | -1.195043 | 0.252404  | -2.401489 | -1.374606 |

Table S25 Theoretical cartesian coordinates (in Å) of  $\text{Cp}_2\text{Pd}_2(\text{CNCH}_3)_2$  **2CNCH<sub>3</sub>-1S** using the MPW1PW91 and BP86 methods

| Atom | MPW1PW91  |           |           | BP86      |           |           |
|------|-----------|-----------|-----------|-----------|-----------|-----------|
|      | X         | Y         | Z         | X         | Y         | Z         |
| C    | 1.750318  | -1.250747 | 0.000000  | 1.745362  | -1.258944 | 0.000000  |
| C    | 2.113947  | -0.498182 | 1.164124  | 2.133524  | -0.505375 | 1.174682  |
| C    | 2.727760  | 0.734677  | 0.687499  | 2.778207  | 0.723621  | 0.694887  |
| C    | 2.727760  | 0.734677  | -0.687499 | 2.778207  | 0.723621  | -0.694887 |
| C    | 2.113947  | -0.498182 | -1.164124 | 2.133524  | -0.505375 | -1.174682 |
| H    | 2.357077  | -0.958883 | 2.116627  | 2.375275  | -0.977646 | 2.133555  |
| H    | 3.088420  | 1.533966  | 1.327137  | 3.158672  | 1.521362  | 1.342012  |
| H    | 1.478089  | -2.301089 | 0.000000  | 1.459583  | -2.316011 | 0.000000  |
| H    | 3.088420  | 1.533966  | -1.327137 | 3.158672  | 1.521362  | -1.342012 |
| H    | 2.357077  | -0.958883 | -2.116627 | 2.375275  | -0.977646 | -2.133555 |
| C    | -2.726971 | -0.739369 | 0.687508  | -2.776658 | -0.735099 | 0.694901  |
| C    | -2.114015 | 0.493902  | 1.164120  | -2.134380 | 0.495152  | 1.174651  |
| C    | -1.751009 | 1.246717  | 0.000000  | -1.747976 | 1.249528  | 0.000000  |
| C    | -2.114015 | 0.493902  | -1.164120 | -2.134380 | 0.495152  | -1.174651 |
| C    | -2.726971 | -0.739369 | -0.687508 | -2.776658 | -0.735099 | -0.694901 |
| H    | -2.357268 | 0.954283  | 2.116754  | -2.376756 | 0.966747  | 2.133709  |
| H    | -1.479279 | 2.297188  | 0.000000  | -1.463703 | 2.306995  | 0.000000  |
| H    | -3.087069 | -1.538930 | 1.327121  | -3.155449 | -1.533640 | 1.342016  |
| H    | -2.357268 | 0.954283  | -2.116754 | -2.376756 | 0.966747  | -2.133709 |
| H    | -3.087069 | -1.538930 | -1.327121 | -3.155449 | -1.533640 | -1.342016 |
| Pd   | 0.000138  | -0.001633 | 1.346213  | 0.000091  | -0.003531 | 1.370192  |
| Pd   | 0.000138  | -0.001633 | -1.346213 | 0.000091  | -0.003531 | -1.370192 |
| C    | 0.000406  | 0.001610  | 3.291035  | 0.000825  | 0.003957  | 3.302346  |
| C    | 0.000406  | 0.001610  | -3.291035 | 0.000825  | 0.003957  | -3.302346 |
| N    | 0.000126  | 0.005125  | -4.467493 | 0.000559  | 0.011516  | -4.498009 |
| N    | 0.000126  | 0.005125  | 4.467493  | 0.000559  | 0.011516  | 4.498009  |
| C    | -0.001114 | 0.011351  | 5.879354  | -0.000702 | 0.025827  | 5.918286  |
| H    | 0.929747  | -0.422738 | 6.256079  | 0.893832  | -0.494362 | 6.306815  |
| H    | -0.090548 | 1.037633  | 6.248009  | 0.004421  | 1.067256  | 6.289142  |
| H    | -0.844994 | -0.575970 | 6.253245  | -0.903088 | -0.483645 | 6.302719  |
| C    | -0.001114 | 0.011351  | -5.879354 | -0.000702 | 0.025827  | -5.918286 |
| H    | -0.844994 | -0.575970 | -6.253245 | -0.903088 | -0.483645 | -6.302719 |
| H    | 0.929747  | -0.422738 | -6.256079 | 0.893832  | -0.494362 | -6.306815 |
| H    | -0.090548 | 1.037633  | -6.248009 | 0.004421  | 1.067256  | -6.289142 |

Table S26 Theoretical cartesian coordinates (in Å) of  $\text{Cp}_2\text{Pd}_2(\text{CNCH}_3)_2$  **2CNCH<sub>3</sub>-2S** using the MPW1PW91 and BP86 methods

| Atom | MPW1PW91  |           |           | BP86      |           |           |
|------|-----------|-----------|-----------|-----------|-----------|-----------|
|      | X         | Y         | Z         | X         | Y         | Z         |
| C    | 0.171080  | -2.887113 | 1.916160  | 0.239891  | -2.909406 | 1.967576  |
| C    | 1.427844  | -2.895741 | 1.270761  | 1.481481  | -2.918620 | 1.264358  |
| C    | 1.236909  | -3.325453 | -0.091495 | 1.232023  | -3.342666 | -0.103113 |
| C    | -0.148844 | -3.562481 | -0.283943 | -0.177436 | -3.573900 | -0.240380 |
| C    | -0.814156 | -3.232559 | 0.947885  | -0.793916 | -3.254807 | 1.034228  |
| H    | -0.020521 | -2.596836 | 2.942003  | 0.090263  | -2.613845 | 3.009358  |
| H    | 2.382443  | -2.652959 | 1.722967  | 2.462620  | -2.672532 | 1.680682  |
| H    | 2.020322  | -3.477897 | -0.824197 | 1.990675  | -3.498538 | -0.874874 |
| H    | -0.614613 | -3.945886 | -1.183820 | -0.685434 | -3.960250 | -1.128162 |
| H    | -1.878856 | -3.320719 | 1.132979  | -1.861461 | -3.332951 | 1.261615  |
| C    | 0.814156  | 3.232559  | 0.947885  | 0.793916  | 3.254807  | 1.034228  |
| C    | -0.171080 | 2.887113  | 1.916160  | -0.239891 | 2.909406  | 1.967576  |
| C    | -1.427844 | 2.895741  | 1.270761  | -1.481481 | 2.918620  | 1.264358  |
| C    | -1.236909 | 3.325453  | -0.091495 | -1.232023 | 3.342666  | -0.103113 |
| C    | 0.148844  | 3.562481  | -0.283943 | 0.177436  | 3.573900  | -0.240380 |
| H    | 1.878856  | 3.320719  | 1.132979  | 1.861461  | 3.332951  | 1.261615  |
| H    | 0.020521  | 2.596836  | 2.942003  | -0.090263 | 2.613845  | 3.009358  |
| H    | -2.382443 | 2.652959  | 1.722967  | -2.462620 | 2.672532  | 1.680682  |
| H    | -2.020322 | 3.477897  | -0.824197 | -1.990675 | 3.498538  | -0.874874 |
| H    | 0.614613  | 3.945886  | -1.183820 | 0.685434  | 3.960250  | -1.128162 |
| Pd   | -0.171080 | 1.300485  | 0.012035  | -0.177436 | 1.306670  | 0.016680  |
| Pd   | 0.171080  | -1.300485 | 0.012035  | 0.177436  | -1.306670 | 0.016680  |
| C    | -1.359811 | -0.141634 | -0.638311 | -1.355288 | -0.150614 | -0.669323 |
| C    | 1.359811  | 0.141634  | -0.638311 | 1.355288  | 0.150614  | -0.669323 |
| N    | 2.449936  | 0.252722  | -1.163286 | 2.453968  | 0.254440  | -1.223622 |
| N    | -2.449936 | -0.252722 | -1.163286 | -2.453968 | -0.254440 | -1.223622 |
| C    | 3.241166  | 1.361554  | -1.617587 | 3.223243  | 1.388419  | -1.698096 |
| H    | 4.181045  | 1.390268  | -1.057282 | 4.186654  | 1.431353  | -1.157620 |
| H    | 2.711741  | 2.314078  | -1.489226 | 2.678407  | 2.342272  | -1.552051 |
| H    | 3.486808  | 1.222201  | -2.674868 | 3.447145  | 1.256096  | -2.772370 |
| C    | -3.241166 | -1.361554 | -1.617587 | -3.223243 | -1.388419 | -1.698096 |
| H    | -3.486808 | -1.222201 | -2.674868 | -3.447145 | -1.256096 | -2.772370 |
| H    | -2.711741 | -2.314078 | -1.489226 | -2.678407 | -2.342272 | -1.552051 |
| H    | -4.181045 | -1.390268 | -1.057282 | -4.186654 | -1.431353 | -1.157620 |

Table S27 Theoretical cartesian coordinates (in Å) of  $\text{Cp}_2\text{Pd}_2(\text{CNCH}_3)_2$  **2CNCH<sub>3</sub>-3S** using the MPW1PW91 and BP86 methods

| Atom | MPW1PW91  |           |           | BP86      |           |           |
|------|-----------|-----------|-----------|-----------|-----------|-----------|
|      | X         | Y         | Z         | X         | Y         | Z         |
| C    | -2.170485 | -1.165200 | -0.379245 | 2.191684  | 1.176669  | -0.415273 |
| C    | -1.958404 | 0.000274  | -1.185080 | 1.948311  | 0.000593  | -1.224615 |
| C    | -2.170485 | 1.165528  | -0.378949 | 2.192970  | -1.174886 | -0.414829 |
| C    | -2.576549 | 0.685144  | 0.941844  | 2.648607  | -0.690974 | 0.900691  |
| C    | -2.576565 | -0.685151 | 0.941671  | 2.647865  | 0.693742  | 0.900432  |
| H    | -1.883638 | 0.000401  | -2.267323 | 1.850829  | 0.000355  | -2.315108 |
| H    | -2.486936 | 2.119032  | -0.792203 | 2.501024  | -2.136450 | -0.842760 |
| H    | -2.487045 | -2.118530 | -0.792826 | 2.498880  | 2.138301  | -0.843682 |
| H    | -2.794096 | 1.323711  | 1.792328  | 2.896508  | -1.336856 | 1.750161  |
| H    | -2.794080 | -1.323926 | 1.792009  | 2.895027  | 1.340196  | 1.749684  |
| C    | 2.170485  | -1.165528 | -0.378949 | -2.192970 | 1.174886  | -0.414829 |
| C    | 1.958404  | -0.000274 | -1.185080 | -1.948311 | -0.000593 | -1.224615 |
| C    | 2.170485  | 1.165200  | -0.379245 | -2.191684 | -1.176669 | -0.415273 |
| C    | 2.576565  | 0.685151  | 0.941671  | -2.647865 | -0.693742 | 0.900432  |
| C    | 2.576549  | -0.685144 | 0.941844  | -2.648607 | 0.690974  | 0.900691  |
| H    | 1.883638  | -0.000401 | -2.267323 | -1.850829 | -0.000355 | -2.315108 |
| H    | 2.487045  | 2.118530  | -0.792826 | -2.498880 | -2.138301 | -0.843682 |
| H    | 2.486936  | -2.119032 | -0.792203 | -2.501024 | 2.136450  | -0.842760 |
| H    | 2.794080  | 1.323926  | 1.792009  | -2.895027 | -1.340196 | 1.749684  |
| H    | 2.794096  | -1.323711 | 1.792328  | -2.896508 | 1.336856  | 1.750161  |
| Pd   | 0.000022  | 1.346802  | -0.291073 | 0.000695  | -1.369237 | -0.307388 |
| Pd   | -0.000022 | -1.346802 | -0.291073 | -0.000695 | 1.369237  | -0.307388 |
| C    | -0.000564 | -3.219182 | 0.208771  | -0.001061 | 3.212730  | 0.246910  |
| C    | 0.000564  | 3.219182  | 0.208771  | 0.001061  | -3.212730 | 0.246910  |
| N    | 0.001256  | 4.346036  | 0.545567  | 0.001061  | -4.344185 | 0.632003  |
| N    | -0.001256 | -4.346036 | 0.545567  | -0.001061 | 4.344185  | 0.632003  |
| C    | 0.002795  | 5.696262  | 0.957705  | 0.000059  | -5.685555 | 1.098284  |
| H    | 0.940405  | 5.929095  | 1.471084  | -0.950302 | -5.909281 | 1.616496  |
| H    | -0.098708 | 6.350988  | 0.087039  | 0.114133  | -6.382918 | 0.248260  |
| H    | -0.832661 | 5.879155  | 1.639951  | 0.836416  | -5.845049 | 1.803160  |
| C    | -0.002795 | -5.696262 | 0.957705  | -0.000059 | 5.685555  | 1.098284  |
| H    | 0.098708  | -6.350988 | 0.087039  | -0.114133 | 6.382918  | 0.248260  |
| H    | -0.940405 | -5.929095 | 1.471084  | 0.950302  | 5.909281  | 1.616496  |
| H    | 0.832661  | -5.879155 | 1.639951  | -0.836416 | 5.845049  | 1.803160  |

Table S28 Theoretical cartesian coordinates (in Å) of  $\text{Cp}_2\text{Pd}_2(\text{CNCH}_3)_2$  **2CNCH<sub>3</sub>-4S** using the MPW1PW91 and BP86 methods

| Atom | MPW1PW91  |           |           | BP86      |           |           |
|------|-----------|-----------|-----------|-----------|-----------|-----------|
|      | X         | Y         | Z         | X         | Y         | Z         |
| C    | 3.410759  | -0.708841 | -0.072700 | 3.415891  | -0.724151 | -0.016229 |
| C    | 2.962439  | -1.146934 | 1.222016  | 2.970963  | -1.157595 | 1.294832  |
| C    | 2.740152  | -0.003500 | 2.030613  | 2.745657  | 0.000870  | 2.102739  |
| C    | 2.963499  | 1.143778  | 1.228203  | 2.976341  | 1.154802  | 1.289486  |
| C    | 3.410982  | 0.712119  | -0.068991 | 3.419636  | 0.713618  | -0.019357 |
| H    | 3.753785  | -1.343470 | -0.880976 | 3.765816  | -1.369129 | -0.826823 |
| H    | 2.872454  | -2.179102 | 1.541249  | 2.869833  | -2.197540 | 1.619487  |
| H    | 2.390956  | -0.006089 | 3.056026  | 2.384167  | 0.004076  | 3.134563  |
| H    | 2.873858  | 2.174378  | 1.552565  | 2.880240  | 2.196610  | 1.609677  |
| H    | 3.754194  | 1.350817  | -0.873980 | 3.772250  | 1.353319  | -0.832946 |
| C    | -3.530529 | -0.825559 | -0.238846 | -3.555789 | -0.779451 | -0.256364 |
| C    | -3.588876 | 0.578603  | -0.410165 | -3.589995 | 0.648922  | -0.345794 |
| C    | -3.216309 | 1.180145  | 0.844146  | -3.225754 | 1.175919  | 0.959077  |
| C    | -3.026727 | 0.147351  | 1.804547  | -3.042959 | 0.077217  | 1.860855  |
| C    | -3.156377 | -1.088718 | 1.130291  | -3.186127 | -1.128348 | 1.106955  |
| H    | -3.746546 | -1.574481 | -0.991239 | -3.783873 | -1.485643 | -1.059119 |
| H    | -3.853828 | 1.108083  | -1.317082 | -3.848487 | 1.239461  | -1.228582 |
| H    | -3.162660 | 2.245820  | 1.035341  | -3.154609 | 2.237498  | 1.213797  |
| H    | -2.746457 | 0.284980  | 2.841709  | -2.755965 | 0.149444  | 2.913135  |
| H    | -3.038257 | -2.073029 | 1.568524  | -3.074826 | -2.146991 | 1.489957  |
| Pd   | -1.399917 | -0.000254 | -0.040906 | -1.404258 | 0.001778  | -0.039050 |
| Pd   | 1.222531  | 0.000683  | 0.052348  | 1.229276  | -0.000120 | 0.057312  |
| C    | -0.080659 | -1.366862 | -0.642435 | -0.077699 | -1.358608 | -0.685569 |
| C    | -0.080341 | 1.368452  | -0.638651 | -0.075743 | 1.361751  | -0.683443 |
| N    | -0.101065 | -2.466014 | -1.159952 | -0.115041 | -2.459064 | -1.244854 |
| N    | -0.104650 | 2.467724  | -1.155439 | -0.110421 | 2.462390  | -1.242229 |
| C    | 0.893607  | 3.412124  | -1.571291 | 0.913298  | 3.388249  | -1.686121 |
| H    | 1.907703  | 3.038315  | -1.381614 | 1.932212  | 3.005833  | -1.477054 |
| H    | 0.748117  | 4.354220  | -1.033537 | 0.776412  | 4.359510  | -1.176390 |
| H    | 0.775783  | 3.616194  | -2.640073 | 0.804080  | 3.561727  | -2.772357 |
| C    | 0.900817  | -3.407860 | -1.572980 | 0.906955  | -3.386975 | -1.688555 |
| H    | 1.913437  | -3.031132 | -1.381266 | 1.926663  | -3.006231 | -1.480407 |
| H    | 0.756673  | -4.349980 | -1.034885 | 0.768634  | -4.357568 | -1.177910 |
| H    | 0.785962  | -3.613004 | -2.641885 | 0.796794  | -3.561230 | -2.774576 |



Table S29 Theoretical cartesian coordinates (in Å) of Cp<sub>2</sub>Pd<sub>2</sub>(CS)<sub>2</sub> **2CS-1S** using the MPW1PW91 and BP86 methods

| Atom | MPW1PW91  |           |           | BP86      |           |           |
|------|-----------|-----------|-----------|-----------|-----------|-----------|
|      | X         | Y         | Z         | X         | Y         | Z         |
| C    | 0.000000  | 2.918393  | 1.868225  | 0.000000  | 2.967769  | 1.893139  |
| H    | 0.000000  | 2.632063  | 2.912909  | 0.000000  | 2.687426  | 2.949830  |
| C    | 1.146507  | 3.092512  | 1.049291  | 1.157487  | 3.137181  | 1.066359  |
| H    | 2.178707  | 3.004091  | 1.367423  | 2.198943  | 3.046681  | 1.387903  |
| C    | 0.710038  | 3.464542  | -0.269818 | 0.718046  | 3.487587  | -0.270461 |
| H    | 1.352052  | 3.706250  | -1.108136 | 1.365260  | 3.721745  | -1.119783 |
| C    | -0.710038 | 3.464542  | -0.269818 | -0.718046 | 3.487587  | -0.270461 |
| H    | -1.352052 | 3.706250  | -1.108136 | -1.365260 | 3.721745  | -1.119783 |
| C    | -1.146507 | 3.092512  | 1.049291  | -1.157487 | 3.137181  | 1.066359  |
| H    | -2.178707 | 3.004091  | 1.367423  | -2.198943 | 3.046681  | 1.387903  |
| C    | 0.000000  | -2.918393 | 1.868225  | 0.000000  | -2.967769 | 1.893139  |
| H    | 0.000000  | -2.632063 | 2.912909  | 0.000000  | -2.687426 | 2.949830  |
| C    | 1.146507  | -3.092512 | 1.049291  | 1.157487  | -3.137181 | 1.066359  |
| H    | 2.178707  | -3.004091 | 1.367423  | 2.198943  | -3.046681 | 1.387903  |
| C    | 0.710038  | -3.464542 | -0.269818 | 0.718046  | -3.487587 | -0.270461 |
| H    | 1.352052  | -3.706250 | -1.108136 | 1.365260  | -3.721745 | -1.119783 |
| C    | -0.710038 | -3.464542 | -0.269818 | -0.718046 | -3.487587 | -0.270461 |
| H    | -1.352052 | -3.706250 | -1.108136 | -1.365260 | -3.721745 | -1.119783 |
| C    | -1.146507 | -3.092512 | 1.049291  | -1.157487 | -3.137181 | 1.066359  |
| H    | -2.178707 | -3.004091 | 1.367423  | -2.198943 | -3.046681 | 1.387903  |
| Pd   | 0.000000  | 1.307392  | 0.020475  | 0.000000  | 1.318437  | 0.016708  |
| Pd   | 0.000000  | -1.307392 | 0.020475  | 0.000000  | -1.318437 | 0.016708  |
| C    | 1.334660  | 0.000000  | -0.630928 | 1.345156  | 0.000000  | -0.639442 |
| C    | -1.334660 | 0.000000  | -0.630928 | -1.345156 | 0.000000  | -0.639442 |
| S    | 2.748498  | 0.000000  | -1.321924 | 2.782063  | 0.000000  | -1.332976 |
| S    | -2.748498 | 0.000000  | -1.321924 | -2.782063 | 0.000000  | -1.332976 |

Table S30 Theoretical cartesian coordinates (in Å) of  $\text{Cp}_2\text{Pd}_2(\text{CS})_2$  **2CS-2S** using the MPW1PW91 and BP86 methods

| Atom | MPW1PW91  |           |           | BP86      |           |           |
|------|-----------|-----------|-----------|-----------|-----------|-----------|
|      | X         | Y         | Z         | X         | Y         | Z         |
| C    | -2.679494 | -1.690348 | 0.746746  | -2.490541 | -1.869231 | 0.841231  |
| C    | -3.340261 | -1.174916 | -0.430079 | -3.283573 | -1.340578 | -0.255304 |
| C    | -3.699456 | 0.155610  | -0.156667 | -3.662827 | -0.016352 | 0.104384  |
| C    | -3.314346 | 0.452797  | 1.207865  | -3.172175 | 0.246540  | 1.456229  |
| C    | -2.759246 | -0.705918 | 1.781687  | -2.500908 | -0.910666 | 1.924460  |
| H    | -2.290862 | -2.696500 | 0.854985  | -2.043996 | -2.867537 | 0.874894  |
| H    | -3.491380 | -1.711274 | -1.358722 | -3.512003 | -1.855818 | -1.191537 |
| H    | -4.199318 | 0.837096  | -0.835677 | -4.262761 | 0.670353  | -0.500455 |
| H    | -3.480226 | 1.398805  | 1.711731  | -3.326632 | 1.174124  | 2.015344  |
| H    | -2.377008 | -0.809195 | 2.789560  | -2.001066 | -1.028690 | 2.889201  |
| C    | 0.453774  | 2.015502  | -1.499624 | 0.467265  | 1.941695  | -1.455899 |
| C    | 1.590484  | 2.513660  | -0.860568 | 1.405409  | 2.639751  | -0.652571 |
| C    | 1.237592  | 2.801676  | 0.517799  | 0.714814  | 3.085925  | 0.553564  |
| C    | -0.113486 | 2.529882  | 0.696493  | -0.626755 | 2.705824  | 0.477626  |
| C    | -0.661617 | 2.003347  | -0.544889 | -0.846310 | 1.947384  | -0.758664 |
| H    | 0.371341  | 1.755003  | -2.548580 | 0.609715  | 1.629638  | -2.495548 |
| H    | 2.558435  | 2.685377  | -1.317431 | 2.426915  | 2.905814  | -0.941907 |
| H    | 1.916438  | 3.188316  | 1.270100  | 1.187069  | 3.624468  | 1.381920  |
| H    | -0.677344 | 2.678389  | 1.610008  | -1.398072 | 2.923848  | 1.222225  |
| H    | -1.665973 | 2.262119  | -0.880496 | -1.771959 | 2.056122  | -1.344848 |
| Pd   | 1.386861  | 0.339269  | -0.043033 | 1.438025  | 0.362613  | -0.074132 |
| Pd   | -1.321279 | -0.053444 | -0.075601 | -1.297897 | -0.112508 | -0.100581 |
| C    | 0.200051  | -1.152852 | -0.619254 | 0.232420  | -1.072452 | -0.837886 |
| C    | 2.861515  | -0.636123 | 0.565306  | 2.856009  | -0.589083 | 0.722923  |
| S    | 0.444516  | -2.559483 | -1.295073 | 0.563528  | -2.356205 | -1.727542 |
| S    | 4.034611  | -1.528641 | 1.028371  | 4.004594  | -1.478149 | 1.315476  |

Table S31 Theoretical cartesian coordinates (in Å) of  $\text{Cp}_2\text{Pd}_2(\text{CS})_2$  **2CS-3S** using the MPW1PW91 and BP86 methods

| Atom | MPW1PW91  |           |           | BP86      |           |           |
|------|-----------|-----------|-----------|-----------|-----------|-----------|
|      | X         | Y         | Z         | X         | Y         | Z         |
| C    | 1.341094  | 2.481696  | 0.687209  | 1.344222  | 2.529887  | 0.694922  |
| C    | 0.000000  | 2.169174  | 1.163782  | 0.000000  | 2.189329  | 1.174026  |
| C    | -0.815007 | 1.970077  | 0.000000  | -0.822124 | 1.968242  | 0.000000  |
| C    | 0.000000  | 2.169174  | -1.163782 | 0.000000  | 2.189329  | -1.174026 |
| C    | 1.341094  | 2.481696  | -0.687209 | 1.344222  | 2.529887  | -0.694922 |
| H    | -0.394878 | 2.518937  | 2.112085  | -0.405076 | 2.536273  | 2.130749  |
| H    | -1.899710 | 1.949107  | 0.000000  | -1.916459 | 1.935628  | 0.000000  |
| H    | 2.197882  | 2.661718  | 1.327950  | 2.203873  | 2.729766  | 1.342867  |
| H    | -0.394878 | 2.518937  | -2.112085 | -0.405076 | 2.536273  | -2.130749 |
| H    | 2.197882  | 2.661718  | -1.327950 | 2.203873  | 2.729766  | -1.342867 |
| C    | 0.815007  | -1.970077 | 0.000000  | 0.822124  | -1.968242 | 0.000000  |
| C    | 0.000000  | -2.169174 | 1.163782  | 0.000000  | -2.189329 | 1.174026  |
| C    | -1.341094 | -2.481696 | 0.687209  | -1.344222 | -2.529887 | 0.694922  |
| C    | -1.341094 | -2.481696 | -0.687209 | -1.344222 | -2.529887 | -0.694922 |
| C    | 0.000000  | -2.169174 | -1.163782 | 0.000000  | -2.189329 | -1.174026 |
| H    | 0.394878  | -2.518937 | 2.112085  | 0.405076  | -2.536273 | 2.130749  |
| H    | -2.197882 | -2.661718 | 1.327950  | -2.203873 | -2.729766 | 1.342867  |
| H    | 1.899710  | -1.949107 | 0.000000  | 1.916459  | -1.935628 | 0.000000  |
| H    | -2.197882 | -2.661718 | -1.327950 | -2.203873 | -2.729766 | -1.342867 |
| H    | 0.394878  | -2.518937 | -2.112085 | 0.405076  | -2.536273 | -2.130749 |
| Pd   | 0.000000  | 0.000000  | 1.377953  | 0.000000  | 0.000000  | 1.406655  |
| Pd   | 0.000000  | 0.000000  | -1.377953 | 0.000000  | 0.000000  | -1.406655 |
| C    | 0.000000  | 0.000000  | 3.250890  | 0.000000  | 0.000000  | 3.279518  |
| C    | 0.000000  | 0.000000  | -3.250890 | 0.000000  | 0.000000  | -3.279518 |
| S    | 0.000000  | 0.000000  | 4.797031  | 0.000000  | 0.000000  | 4.848606  |
| S    | 0.000000  | 0.000000  | -4.797031 | 0.000000  | 0.000000  | -4.848606 |

Table S32 Theoretical cartesian coordinates (in Å) of Cp<sub>2</sub>Pd<sub>2</sub>(CS)<sub>2</sub> **2CS-4S** using the MPW1PW91 and BP86 methods

| Atom | MPW1PW91  |           |           | BP86      |           |           |
|------|-----------|-----------|-----------|-----------|-----------|-----------|
|      | X         | Y         | Z         | X         | Y         | Z         |
| C    | 2.602730  | 0.684522  | 0.898505  | 2.688174  | 0.692084  | 0.821642  |
| C    | 2.165134  | 1.165048  | -0.411998 | 2.184177  | 1.175294  | -0.474778 |
| C    | 1.918344  | 0.000000  | -1.211864 | 1.895212  | 0.000000  | -1.273887 |
| C    | 2.165134  | -1.165048 | -0.411998 | 2.184177  | -1.175294 | -0.474778 |
| C    | 2.602730  | -0.684522 | 0.898505  | 2.688174  | -0.692084 | 0.821642  |
| H    | 2.476280  | 2.115506  | -0.834963 | 2.475482  | 2.136089  | -0.914924 |
| H    | 1.822302  | 0.000000  | -2.292421 | 1.761965  | 0.000000  | -2.360586 |
| H    | 2.850054  | 1.325196  | 1.738436  | 2.975822  | 1.340110  | 1.655907  |
| H    | 2.476280  | -2.115506 | -0.834963 | 2.475482  | -2.136089 | -0.914924 |
| H    | 2.850054  | -1.325196 | 1.738436  | 2.975822  | -1.340110 | 1.655907  |
| C    | -2.602730 | 0.684522  | 0.898505  | -2.688174 | 0.692084  | 0.821642  |
| C    | -2.165134 | 1.165048  | -0.411998 | -2.184177 | 1.175294  | -0.474778 |
| C    | -1.918344 | 0.000000  | -1.211864 | -1.895212 | 0.000000  | -1.273887 |
| C    | -2.165134 | -1.165048 | -0.411998 | -2.184177 | -1.175294 | -0.474778 |
| C    | -2.602730 | -0.684522 | 0.898505  | -2.688174 | -0.692084 | 0.821642  |
| H    | -2.476280 | 2.115506  | -0.834963 | -2.475482 | 2.136089  | -0.914924 |
| H    | -1.822302 | 0.000000  | -2.292421 | -1.761965 | 0.000000  | -2.360586 |
| H    | -2.850054 | 1.325196  | 1.738436  | -2.975822 | 1.340110  | 1.655907  |
| H    | -2.476280 | -2.115506 | -0.834963 | -2.475482 | -2.136089 | -0.914924 |
| H    | -2.850054 | -1.325196 | 1.738436  | -2.975822 | -1.340110 | 1.655907  |
| Pd   | 0.000000  | 1.378439  | -0.279643 | 0.000000  | 1.404028  | -0.294777 |
| Pd   | 0.000000  | -1.378439 | -0.279643 | 0.000000  | -1.404028 | -0.294777 |
| C    | 0.000000  | 3.159578  | 0.282073  | 0.000000  | 3.154368  | 0.355337  |
| C    | 0.000000  | -3.159578 | 0.282073  | 0.000000  | -3.154368 | 0.355337  |
| S    | 0.000000  | 4.609288  | 0.818107  | 0.000000  | 4.590084  | 0.986704  |
| S    | 0.000000  | -4.609288 | 0.818107  | 0.000000  | -4.590084 | 0.986704  |

Table S33 Theoretical harmonic vibrational frequencies (in  $\text{cm}^{-1}$ ) and IR intensities (in  $\text{km/mol}$ ) of  $\text{Cp}_2\text{Pd}_2\text{F}_2$  **2F-1S** by MPW1PW91 and BP86 methods

| MPW1PW91                                                                                                                                                                                                                                                                                                                                                                                                                                                                                                                                                                                     | BP86                                                                                                                                                                                                                                                                                                                                                                                                                                                                                                                                                                                      |
|----------------------------------------------------------------------------------------------------------------------------------------------------------------------------------------------------------------------------------------------------------------------------------------------------------------------------------------------------------------------------------------------------------------------------------------------------------------------------------------------------------------------------------------------------------------------------------------------|-------------------------------------------------------------------------------------------------------------------------------------------------------------------------------------------------------------------------------------------------------------------------------------------------------------------------------------------------------------------------------------------------------------------------------------------------------------------------------------------------------------------------------------------------------------------------------------------|
| 29(0), 70(3), 82(2), 120(1), 128(0), 141(1), 158(0), 170(3), 187(4), 242(0), 283(17), 340(0), 347(2), 360(3), 416(2), 453(12), 528(97), 566(8), 596(0), 614(2), 633(0), 744(4), 756(13), 771(17), 782(88), 809(21), 821(8), 830(1), 831(1), 836(3), 884(1), 891(2), 908(11), 931(9), 946(0), 1001(8), 1009(14), 1024(16), 1043(22), 1060(1), 1069(2), 1082(19), 1086(1), 1126(4), 1158(68), 1270(0), 1276(0), 1308(2), 1337(31), 1378(22), 1392(9), 1403(13), 1444(4), 1458(33), 1466(7), 1500(1), 3042(29), 3218(2), 3223(1), 3246(1), 3258(1), 3264(1), 3269(0), 3272(1), 3285(1), 3292(2) | 28(0), 65(3), 83(2), 113(1), 122(1), 134(1), 152(0), 165(3), 183(3), 232(0), 270(12), 328(0), 336(2), 348(1), 390(1), 438(7), 505(74), 537(10), 564(0), 580(1), 598(0), 704(3), 722(13), 736(18), 746(73), 767(15), 785(6), 791(2), 795(2), 801(2), 833(0), 841(2), 864(13), 877(5), 891(1), 955(8), 966(13), 982(14), 991(20), 1020(1), 1024(25), 1033(18), 1040(0), 1074(3), 1079(46), 1216(0), 1220(0), 1237(2), 1274(32), 1310(13), 1326(6), 1334(12), 1372(28), 1379(4), 1396(1), 1414(1), 2919(37), 3109(1), 3110(4), 3130(2), 3144(0), 3152(1), 3157(0), 3158(1), 3175(1), 3183(2) |

Table S34 Theoretical harmonic vibrational frequencies (in  $\text{cm}^{-1}$ ) and IR intensities (in  $\text{km/mol}$ ) of  $\text{Cp}_2\text{Pd}_2\text{F}_2$  **2F-2S** by MPW1PW91 and BP86 methods

| MPW1PW91                                                                                                                                                                                                                                                                                                                                                                                                                                                                                                                                                                                      | BP86                                                                                                                                                                                                                                                                                                                                                                                                                                                                                                                                                                                 |
|-----------------------------------------------------------------------------------------------------------------------------------------------------------------------------------------------------------------------------------------------------------------------------------------------------------------------------------------------------------------------------------------------------------------------------------------------------------------------------------------------------------------------------------------------------------------------------------------------|--------------------------------------------------------------------------------------------------------------------------------------------------------------------------------------------------------------------------------------------------------------------------------------------------------------------------------------------------------------------------------------------------------------------------------------------------------------------------------------------------------------------------------------------------------------------------------------|
| 35(0), 80(0), 86(22), 103(1), 131(10), 133(14), 152(0), 182(0), 185(14), 208(2), 248(0), 251(15), 354(20), 370(2), 388(15), 393(0), 469(223), 509(0), 587(2), 600(0), 608(2), 624(0), 788(3), 791(115), 800(0), 802(0), 816(126), 818(0), 820(1), 839(1), 848(2), 870(2), 873(2), 907(0), 912(0), 918(3), 980(20), 990(14), 1027(0), 1027(22), 1060(30), 1062(0), 1075(1), 1083(0), 1114(4), 1117(0), 1273(0), 1274(0), 1347(0), 1355(59), 1393(4), 1435(0), 1443(24), 1443(23), 1460(0), 1464(13), 3267(0), 3267(0), 3267(0), 3267(1), 3277(1), 3277(1), 3280(0), 3280(23), 3288(0), 3288(0) | 29(0), 65(0), 70(17), 97(0), 117(4), 130(13), 147(0), 177(0), 177(1), 182(10), 222(7), 224(0), 353(0), 354(8), 355(8), 366(2), 459(183), 487(0), 562(0), 564(2), 570(1), 591(0), 752(149), 758(1), 759(3), 761(0), 780(0), 783(0), 784(49), 800(2), 808(5), 828(3), 831(0), 855(0), 857(0), 862(5), 939(12), 943(12), 983(0), 984(18), 1023(16), 1026(1), 1034(1), 1045(0), 1064(1), 1066(0), 1220(0), 1221(0), 1290(29), 1295(2), 1319(2), 1367(0), 1378(20), 1378(19), 1395(0), 1397(11), 3149(0), 3150(0), 3155(0), 3155(1), 3161(1), 3161(0), 3169(0), 3169(9), 3177(0), 3177(0) |

Table S35 Theoretical harmonic vibrational frequencies (in  $\text{cm}^{-1}$ ) and IR intensities (in  $\text{km/mol}$ ) of  $\text{Cp}_2\text{Pd}_2\text{F}_2$  **2F-3S** by MPW1PW91 and BP86 methods

| MPW1PW91                                                                                                                                                                                                                                                                                                                                                                                                                                                                                                                                                                              | BP86                                                                                                                                                                                                                                                                                                                                                                                                                                                                                                                                                                                 |
|---------------------------------------------------------------------------------------------------------------------------------------------------------------------------------------------------------------------------------------------------------------------------------------------------------------------------------------------------------------------------------------------------------------------------------------------------------------------------------------------------------------------------------------------------------------------------------------|--------------------------------------------------------------------------------------------------------------------------------------------------------------------------------------------------------------------------------------------------------------------------------------------------------------------------------------------------------------------------------------------------------------------------------------------------------------------------------------------------------------------------------------------------------------------------------------|
| 24(3), 55(0), 70(4), 90(0), 105(0), 115(0), 119(0), 143(0), 158(2), 171(2), 296(6), 301(0), 340(4), 348(1), 372(0), 403(21), 422(0), 437(501), 540(0), 541(2), 602(14), 602(0), 725(79), 726(0), 786(82), 787(6), 806(0), 806(1), 828(56), 829(0), 888(0), 889(0), 912(0), 913(20), 932(8), 933(2), 962(0), 962(15), 1026(11), 1027(19), 1061(0), 1061(1), 1072(1), 1073(13), 1139(3), 1139(0), 1272(0), 1272(0), 1371(0), 1371(9), 1419(36), 1420(1), 1433(0), 1433(16), 1575(22), 1576(5), 3265(1), 3265(2), 3266(0), 3266(3), 3278(0), 3278(2), 3292(0), 3292(0), 3299(2), 3299(1) | 26(3), 50(0), 66(4), 88(0), 101(0), 111(0), 115(0), 160(0), 169(2), 180(5), 280(5), 282(0), 337(10), 344(1), 359(0), 381(17), 413(0), 423(361), 517(0), 518(2), 572(15), 573(1), 680(84), 680(0), 745(50), 747(8), 771(0), 772(1), 784(45), 785(0), 841(0), 841(0), 860(0), 860(20), 877(6), 879(4), 911(0), 911(11), 982(11), 982(16), 1017(0), 1018(1), 1027(0), 1028(12), 1090(5), 1090(0), 1218(0), 1218(0), 1299(0), 1299(8), 1347(36), 1348(1), 1359(0), 1360(17), 1512(23), 1513(4), 3150(2), 3150(2), 3151(0), 3151(6), 3165(0), 3165(6), 3175(1), 3176(2), 3186(4), 3186(2) |

Table S36 Theoretical harmonic vibrational frequencies (in  $\text{cm}^{-1}$ ) and IR intensities (in  $\text{km/mol}$ ) of  $\text{Cp}_2\text{Pd}_2\text{F}_2$  **2F-4S** by MPW1PW91 and BP86 methods

| MPW1PW91                                                                                                                                                                                                                                                                                                                                                                                                                                                                                                                                                                                    | BP86                                                                                                                                                                                                                                                                                                                                                                                                                                                                                                                                                                                 |
|---------------------------------------------------------------------------------------------------------------------------------------------------------------------------------------------------------------------------------------------------------------------------------------------------------------------------------------------------------------------------------------------------------------------------------------------------------------------------------------------------------------------------------------------------------------------------------------------|--------------------------------------------------------------------------------------------------------------------------------------------------------------------------------------------------------------------------------------------------------------------------------------------------------------------------------------------------------------------------------------------------------------------------------------------------------------------------------------------------------------------------------------------------------------------------------------|
| 34(1), 42(0), 83(2), 103(2), 110(1), 134(2), 163(2), 166(3), 191(2), 199(6), 222(3), 238(3), 329(2), 345(5), 397(24), 403(9), 446(26), 542(3), 578(140), 590(2), 593(13), 690(9), 752(8), 771(69), 777(94), 805(10), 810(3), 817(1), 839(24), 851(41), 888(3), 906(14), 916(10), 925(1), 933(3), 940(44), 987(6), 989(9), 1022(5), 1033(12), 1064(13), 1066(7), 1082(4), 1087(0), 1126(3), 1144(0), 1275(1), 1277(0), 1335(2), 1377(3), 1408(52), 1411(19), 1433(55), 1469(21), 1529(2), 1568(43), 3172(2), 3238(2), 3253(5), 3262(1), 3261(2), 3277(0), 3281(4), 3285(0), 3297(0), 3304(1) | 31(0), 41(0), 72(4), 96(1), 102(1), 124(2), 139(1), 155(3), 184(4), 185(2), 215(6), 220(1), 319(5), 323(2), 372(22), 402(2), 420(8), 511(4), 554(8), 556(109), 562(10), 655(3), 712(7), 729(74), 739(92), 766(7), 779(1), 785(3), 804(17), 815(29), 833(7), 852(3), 859(10), 864(8), 877(5), 906(12), 945(2), 950(8), 972(2), 989(12), 1024(11), 1028(3), 1039(2), 1039(2), 1077(4), 1096(0), 1221(1), 1223(0), 1267(2), 1311(4), 1340(63), 1353(25), 1353(6), 1395(18), 1454(2), 1470(36), 3058(2), 3122(2), 3135(8), 3151(2), 3151(3), 3167(0), 3170(4), 3175(1), 3187(0), 3193(1) |

Table S37 Theoretical harmonic vibrational frequencies (in  $\text{cm}^{-1}$ ) and IR intensities (in  $\text{km/mol}$ ) of  $\text{Cp}_2\text{Pd}_2\text{F}_2$  **2CI-1S** by MPW1PW91 and BP86 methods

| MPW1PW91                                                                                                                                                                                                                                                                                                                                                                                                                                                                                                                                                                                                                         | BP86                                                                                                                                                                                                                                                                                                                                                                                                                                                                                                                                                                                                                        |
|----------------------------------------------------------------------------------------------------------------------------------------------------------------------------------------------------------------------------------------------------------------------------------------------------------------------------------------------------------------------------------------------------------------------------------------------------------------------------------------------------------------------------------------------------------------------------------------------------------------------------------|-----------------------------------------------------------------------------------------------------------------------------------------------------------------------------------------------------------------------------------------------------------------------------------------------------------------------------------------------------------------------------------------------------------------------------------------------------------------------------------------------------------------------------------------------------------------------------------------------------------------------------|
| 33(0), 55(12), 69(0), 98(6), 99(2), 121(5),<br>131(0), 171(0), 173(30), 207(2), 210(0),<br>249(12), 299(88), 342(0), 345(17), 362(2),<br>391(1), 394(0), 584(1), 598(0), 608(1),<br>622(0), 789(0), 796(85), 806(0), 810(0),<br>815(176), 819(0), 822(0), 838(1), 848(0),<br>870(1), 878(2), 910(1), 912(0), 919(2),<br>985(24), 995(13), 1026(0), 1026(13),<br>1061(23), 1063(0), 1077(0), 1084(0),<br>1114(6), 1117(0), 1273(0), 1274(0),<br>1345(0), 1353(57), 1395(5), 1435(0),<br>1440(25), 1442(23), 1460(0), 1464(17),<br>3269(0), 3270(1), 3270(0), 3270(0),<br>3279(1), 3280(4), 3282(0), 3282(20),<br>3290(1), 3290(0) | 30(0), 45(10), 57(0), 95(6), 95(1), 113(3),<br>125(0), 167(0), 170(20), 178(1), 193(0),<br>222(7), 291(73), 322(0), 344(8), 357(2),<br>358(0), 360(0), 562(0), 565(2), 567(0),<br>589(0), 759(144), 761(0), 766(1), 769(0),<br>783(0), 784(75), 785(0), 801(2), 806(1),<br>826(1), 836(0), 858(0), 860(0), 865(4),<br>941(14), 948(11), 983(0), 984(11),<br>1023(12), 1027(1), 1036(0), 1046(0),<br>1064(3), 1067(0), 1220(0), 1221(0),<br>1289(29), 1294(1), 1322(3), 1367(0),<br>1377(21), 1377(20), 1395(0), 1398(15),<br>3155(0), 3155(0), 3158(0), 3158(1),<br>3165(1), 3165(0), 3171(0), 3171(6),<br>3178(0), 3179(0) |

Table S38 Theoretical harmonic vibrational frequencies (in  $\text{cm}^{-1}$ ) and IR intensities (in  $\text{km/mol}$ ) of  $\text{Cp}_2\text{Pd}_2\text{F}_2$  **2CI-2S** by MPW1PW91 and BP86 methods

| MPW1PW91                                                                                                                                                                                                                                                                                                                                                                                                                                                                                                                                                                                                                      | BP86                                                                                                                                                                                                                                                                                                                                                                                                                                                                                                                                                                                                                        |
|-------------------------------------------------------------------------------------------------------------------------------------------------------------------------------------------------------------------------------------------------------------------------------------------------------------------------------------------------------------------------------------------------------------------------------------------------------------------------------------------------------------------------------------------------------------------------------------------------------------------------------|-----------------------------------------------------------------------------------------------------------------------------------------------------------------------------------------------------------------------------------------------------------------------------------------------------------------------------------------------------------------------------------------------------------------------------------------------------------------------------------------------------------------------------------------------------------------------------------------------------------------------------|
| 12(2), 45(0), 66(3), 73(1), 78(0), 87(0),<br>103(0), 107(0), 1281, 139(0), 251(0),<br>262(12), 270(56), 271(1), 290(0), 294(2),<br>340(58), 342(0), 527(0), 527(2), 591(27),<br>592(0), 729(65), 730(0), 776(102),<br>776(11), 803(0), 801(1), 832(89), 833(0),<br>885(0), 885(1), 909(0), 909(10), 924(7),<br>924(0), 967(0), 968(11), 1031(23),<br>1033(27), 1061(0), 1062(0), 1073(8),<br>1073(11), 1141(2), 1141(0), 1273(0),<br>1273(0), 1369(0), 1369(7), 1425(67),<br>1426(4), 1432(0), 1432(28), 1561(40),<br>1562(7), 3270(2), 3271(1), 3271(0),<br>3271(2), 3283(0), 3283(1), 3297(0),<br>3298(0), 3304(3), 3304(0) | 19(2), 51(0), 60(2), 80(0), 82(2), 83(0),<br>101(0), 119(0), 123(0), 137(0), 233(0),<br>249(10), 256(39), 271(0), 271(2), 271(1),<br>330(29), 334(0), 507(2), 507(0), 562(31),<br>563(1), 684(74), 684(1), 739(60), 740(20),<br>771(0), 771(1), 791(73), 792(1), 837(0),<br>837(1), 854(0), 855(11), 871(6), 871(2),<br>918(0), 918(9), 986(18), 988(24), 1020(0),<br>1020(0), 1029(8), 1030(10), 1091(3),<br>1092(0), 1220(0), 1220(0), 1299(7),<br>1299(0), 1354(62), 1355(5), 1365(0),<br>1365(25), 1499(36), 1500(8), 3156(2),<br>3156(2), 3157(0), 3157(4), 3169(0),<br>3169(5), 3183(0), 3183(1), 3190(6),<br>3190(0) |

Table S39 Theoretical harmonic vibrational frequencies (in  $\text{cm}^{-1}$ ) and IR intensities (in  $\text{km/mol}$ ) of  $\text{Cp}_2\text{Pd}_2\text{Cl}_2$  **2Cl-3S** by MPW1PW91 and BP86 methods

| MPW1PW91                                                                                                                                                                                                                                                                                                                                                                                                                                                                                                                                                                               | BP86                                                                                                                                                                                                                                                                                                                                                                                                                                                                                                                                                                                      |
|----------------------------------------------------------------------------------------------------------------------------------------------------------------------------------------------------------------------------------------------------------------------------------------------------------------------------------------------------------------------------------------------------------------------------------------------------------------------------------------------------------------------------------------------------------------------------------------|-------------------------------------------------------------------------------------------------------------------------------------------------------------------------------------------------------------------------------------------------------------------------------------------------------------------------------------------------------------------------------------------------------------------------------------------------------------------------------------------------------------------------------------------------------------------------------------------|
| 40(0), 55(2), 67(0), 100(0), 111(0), 121(1), 135(0), 147(2), 185(6), 224(1), 281(8), 285(7), 324(7), 341(34), 357(1), 408(2), 421(0), 444(4), 601(0), 609(2), 632(1), 734(17), 741(3), 773(4), 780(110), 814(15), 814(14), 826(5), 830(3), 834(4), 844(38), 888(1), 893(3), 923(8), 946(0), 963(9), 1008(13), 1020(8), 1024(14), 1037(13), 1059(2), 1071(2), 1088(2), 1101(9), 1125(5), 1241(31), 1265(3), 1269(0), 1291(5), 1374(8), 1388(9), 1403(10), 1442(5), 1448(15), 1470(4), 1494(2), 3081(7), 3216(2), 3229(0), 3246(1), 3263(1), 3266(1), 3271(0), 3275(1), 3287(0), 3293(2) | 22(0), 54(2), 63(0), 97(0), 105(0), 114(1), 138(0), 143(1), 183(5), 213(0), 268(10), 273(1), 316(13), 329(18), 342(1), 388(1), 410(0), 416(6), 572(0), 577(2), 599(1), 699(16), 701(2), 738(7), 743(98), 772(20), 775(7), 788(6), 795(3), 799(2), 800(30), 837(0), 842(3), 869(9), 946(0), 891(0), 912(8), 966(12), 974(7), 982(14), 988(10), 1019(1), 1031(2), 1043(1), 1054(6), 1075(3), 1181(32), 1210(4), 1217(0), 1225(2), 1308(6), 1321(6), 1334(7), 1362(12), 1377(3), 1399(3), 1406(2), 2965(11), 3109(2), 3114(2), 3130(2), 3148(0), 3156(1), 3160(1), 3161(1), 3178(1), 3184(2) |

Table S40 Theoretical harmonic vibrational frequencies (in  $\text{cm}^{-1}$ ) and IR intensities (in  $\text{km/mol}$ ) of  $\text{Cp}_2\text{Pd}_2\text{Cl}_2$  **2Cl-4S** by MPW1PW91 and BP86 methods

| MPW1PW91                                                                                                                                                                                                                                                                                                                                                                                                                                                                                                                                                                              | BP86                                                                                                                                                                                                                                                                                                                                                                                                                                                                                                                                                                           |
|---------------------------------------------------------------------------------------------------------------------------------------------------------------------------------------------------------------------------------------------------------------------------------------------------------------------------------------------------------------------------------------------------------------------------------------------------------------------------------------------------------------------------------------------------------------------------------------|--------------------------------------------------------------------------------------------------------------------------------------------------------------------------------------------------------------------------------------------------------------------------------------------------------------------------------------------------------------------------------------------------------------------------------------------------------------------------------------------------------------------------------------------------------------------------------|
| 21(1), 30(0), 80(0), 89(1), 97(1), 111(2), 127(3), 137(4), 176(1), 195(3), 217(2), 244(0), 265(2), 276(13), 318(1), 338(14), 359(48), 396(4), 539(2), 583(2), 587(6), 684(5), 758(7), 776(73), 780(92), 801(5), 807(11), 815(1), 839(23), 848(43), 887(4), 909(9), 918(8), 924(2), 938(3), 959(10), 990(6), 991(4), 1027(8), 1034(11), 1059(6), 1065(13), 1079(3), 1090(0), 1128(4), 1145(0), 1271(0), 1277(0), 1330(2), 1375(4), 1404(28), 1408(26), 1439(35), 1466(26), 1524(2), 1589(25), 3150(9), 3238(3), 3257(4), 3262(2), 3264(1), 3280(0), 3282(4), 3288(0), 3299(1), 3306(0) | 11(1), 30(0), 73(1), 76(0), 85(1), 104(1), 114(2), 130(3), 151(1), 183(3), 201(2), 222(2), 244(2), 257(10), 306(0), 312(9), 348(39), 389(1), 507(1), 546(2), 557(4), 645(2), 720(6), 738(77), 743(93), 764(6), 774(5), 783(1), 803(17), 808(20), 829(5), 854(3), 861(2), 861(8), 883(2), 907(2), 950(2), 951(6), 978(3), 992(12), 1020(2), 1025(10), 1037(2), 1041(0), 1081(4), 1097(0), 1219(0), 1224(0), 1268(2), 1309(3), 1338(46), 1345(8), 1355(4), 1392(20), 1450(2), 1498(12), 3041(6), 3124(4), 3143(5), 3150(3), 3152(2), 3170(0), 3171(5), 3178(0), 3189(0), 3196(1) |



Table S41 Theoretical harmonic vibrational frequencies (in  $\text{cm}^{-1}$ ) and IR intensities (in  $\text{km/mol}$ ) of  $\text{Cp}_2\text{Pd}_2(\text{CN})_2$  **2CN-1S** by MPW1PW91 and BP86 methods

| MPW1PW91                                                                                                                                                                                                                                                                                                                                                                                                                                                                                                                                                                                                                                   | BP86                                                                                                                                                                                                                                                                                                                                                                                                                                                                                                                                                                                                                               |
|--------------------------------------------------------------------------------------------------------------------------------------------------------------------------------------------------------------------------------------------------------------------------------------------------------------------------------------------------------------------------------------------------------------------------------------------------------------------------------------------------------------------------------------------------------------------------------------------------------------------------------------------|------------------------------------------------------------------------------------------------------------------------------------------------------------------------------------------------------------------------------------------------------------------------------------------------------------------------------------------------------------------------------------------------------------------------------------------------------------------------------------------------------------------------------------------------------------------------------------------------------------------------------------|
| 40(1), 55(5), 65(3), 85(3), 93(3), 105(1), 122(1), 153(1), 178(5), 201(4), 226(0), 278(12), 289(6), 330(0), 349(2), 368(2), 393(7), 407(2), 443(2), 447(16), 524(2), 547(0), 605(0), 615(2), 631(1), 748(21), 755(8), 782(52), 785(13), 809(38), 818(19), 829(0), 830(4), 839(12), 885(26), 891(4), 900(8), 930(12), 950(0), 1005(11), 1006(8), 1027(15), 1030(15), 1059(1), 1064(2), 1074(1), 1091(2), 1108(13), 1123(6), 1236(7), 1271(0), 1280(2), 1295(5), 1376(4), 1393(4), 1403(7), 1445(3), 1448(12), 1465(6), 1495(0), 2254(8), 2372(11), 3030(3), 3221(1), 3231(0), 3249(1), 3263(1), 3270(0), 3275(2), 3277(3), 3285(0), 3292(2) | 23(2), 52(3), 59(3), 79(3), 86(2), 98(1), 121(1), 141(0), 173(4), 190(3), 216(0), 268(9), 273(5), 319(0), 333(1), 356(0), 380(3), 387(2), 416(3), 434(10), 500(1), 518(0), 572(0), 581(1), 596(1), 715(10), 720(10), 749(37), 751(26), 770(40), 779(10), 789(3), 795(1), 802(8), 839(18), 844(12), 852(5), 876(9), 892(1), 965(5), 965(12), 979(14), 984(13), 1014(1), 1022(2), 1034(0), 1045(2), 1061(11), 1071(4), 1170(8), 1218(0), 1219(1), 1234(7), 1310(4), 1324(5), 1335(2), 1360(9), 1382(3), 1390(3), 1407(0), 2116(5), 2240(9), 2900(7), 3115(2), 3116(1), 3134(1), 3150(0), 3161(1), 3164(1), 3167(1), 3175(0), 3183(2) |

Table S42 Theoretical harmonic vibrational frequencies (in  $\text{cm}^{-1}$ ) and IR intensities (in  $\text{km/mol}$ ) of  $\text{Cp}_2\text{Pd}_2(\text{CN})_2$  **2CN-2S** by MPW1PW91 and BP86 methods

| MPW1PW91                                                                                                                                                                                                                                                                                                                                                                                                                                                                                                                                                                                                                                | BP86                                                                                                                                                                                                                                                                                                                                                                                                                                                                                                                                                                                                                               |
|-----------------------------------------------------------------------------------------------------------------------------------------------------------------------------------------------------------------------------------------------------------------------------------------------------------------------------------------------------------------------------------------------------------------------------------------------------------------------------------------------------------------------------------------------------------------------------------------------------------------------------------------|------------------------------------------------------------------------------------------------------------------------------------------------------------------------------------------------------------------------------------------------------------------------------------------------------------------------------------------------------------------------------------------------------------------------------------------------------------------------------------------------------------------------------------------------------------------------------------------------------------------------------------|
| 16(0), 23(2), 25(1), 36(0), 67(2), 79(0), 104(0), 139(1), 162(0), 164(1), 240(1), 248(0), 306(0), 317(33), 324(1), 329(53), 332(0), 350(0), 393(0), 413(28), 467(58), 492(0), 555(0), 559(1), 599(10), 600(0), 743(9), 744(4), 774(211), 775(0), 818(0), 820(1), 840(64), 841(0), 881(0), 881(4), 906(0), 907(1), 929(0), 930(7), 988(0), 989(17), 1035(8), 1035(34), 1065(28), 1066(0), 1077(8), 1078(1), 1143(0), 1143(0), 1276(0), 1276(0), 1374(3), 1375(1), 1414(49), 1415(1), 1458(102), 1460(0), 1530(15), 1530(2), 2130(0), 2153(542), 3275(1), 3275(0), 3276(1), 3276(0), 3286(0), 3286(1), 3299(0), 3299(0), 3306(2), 3306(0) | 20(2), 26(0), 32(1), 59(0), 66(2), 75(0), 98(1), 128(0), 137(0), 149(1), 218(2), 225(0), 292(0), 305(8), 306(0), 320(10), 323(44), 352(0), 390(0), 414(18), 488(26), 500(0), 519(0), 528(1), 566(0), 567(7), 700(3), 701(5), 734(206), 735(0), 783(0), 788(0), 806(56), 808(0), 828(0), 828(8), 850(0), 850(0), 874(0), 875(4), 948(0), 948(17), 991(33), 992(3), 1026(33), 1026(0), 1035(8), 1036(0), 1096(1), 1096(0), 1222(0), 1222(0), 1305(3), 1308(0), 1349(49), 1349(0), 1393(110), 1395(0), 1456(1), 1456(6), 1981(0), 2004(547), 3163(3), 3163(0), 3166(1), 3166(0), 3176(0), 3176(4), 3190(0), 3190(0), 3196(4), 3196(0) |

Table S43 Theoretical harmonic vibrational frequencies (in  $\text{cm}^{-1}$ ) and IR intensities (in  $\text{km/mol}$ ) of  $\text{Cp}_2\text{Pd}_2(\text{CN})_2$  **2CN-3S** by MPW1PW91 and BP86 methods

| MPW1PW91                                                                                                                                                                                                                                                                                                                                                                                                                                                                                                                                                                                                                                    | BP86                                                                                                                                                                                                                                                                                                                                                                                                                                                                                                                                                                                                                                     |
|---------------------------------------------------------------------------------------------------------------------------------------------------------------------------------------------------------------------------------------------------------------------------------------------------------------------------------------------------------------------------------------------------------------------------------------------------------------------------------------------------------------------------------------------------------------------------------------------------------------------------------------------|------------------------------------------------------------------------------------------------------------------------------------------------------------------------------------------------------------------------------------------------------------------------------------------------------------------------------------------------------------------------------------------------------------------------------------------------------------------------------------------------------------------------------------------------------------------------------------------------------------------------------------------|
| 28(2), 37(0), 64(2), 68(0), 81(0), 89(1), 97(0), 130(0), 161(1), 189(0), 279(16), 279(2), 285(1), 295(13), 305(2), 313(0), 346(23), 355(3), 375(2), 426(29), 468(7), 495(67), 521(3), 571(1), 592(6), 607(1), 735(28), 754(8), 775(85), 782(98), 803(1), 827(1), 835(46), 845(23), 867(1), 886(0), 904(1), 911(4), 914(4), 925(3), 973(8), 995(9), 1034(29), 1042(27), 1061(0), 1067(0), 1073(14), 1073(8), 1141(1), 1145(0), 1274(0), 1274(0), 1369(2), 1384(1), 1423(84), 1427(16), 1434(12), 1443(11), 1518(14), 1552(23), 2174(39), 2197(505), 3273(1), 3274(1), 3276(1), 3277(1), 3284(0), 3287(1), 3298(0), 3299(0), 3305(1), 3306(2) | 28(2), 36(0), 61(2), 65(0), 79(0), 91(0), 97(0), 112(2), 160(1), 169(1), 259(1), 262(1), 268(2), 269(4), 290(9), 307(1), 330(8), 339(1), 356(1), 412(37), 454(3), 496(4), 499(32), 536(1), 557(6), 572(0), 689(35), 711(6), 737(68), 743(95), 769(1), 791(1), 798(41), 811(21), 820(1), 834(0), 851(1), 855(4), 859(3), 866(4), 926(6), 953(9), 991(30), 1001(27), 1019(0), 1026(0), 1030(10), 1033(13), 1092(1), 1097(0), 1222(0), 1222(0), 1300(2), 1315(1), 1356(93), 1359(10), 1366(10), 1378(11), 1449(13), 1485(24), 2033(47), 2059(394), 3160(1), 3161(2), 3166(1), 3167(1), 3172(2), 3178(2), 3187(0), 3189(0), 3193(3), 3197(2) |

Table S44 Theoretical harmonic vibrational frequencies (in  $\text{cm}^{-1}$ ) and IR intensities (in  $\text{km/mol}$ ) of  $\text{Cp}_2\text{Pd}_2(\text{CN})_2$  **2CN-4S** by MPW1PW91 and BP86 methods

| MPW1PW91                                                                                                                                                                                                                                                                                                                                                                                                                                                                                                                                                                                                                                   | BP86                                                                                                                                                                                                                                                                                                                                                                                                                                                                                                                                                                                                                                      |
|--------------------------------------------------------------------------------------------------------------------------------------------------------------------------------------------------------------------------------------------------------------------------------------------------------------------------------------------------------------------------------------------------------------------------------------------------------------------------------------------------------------------------------------------------------------------------------------------------------------------------------------------|-------------------------------------------------------------------------------------------------------------------------------------------------------------------------------------------------------------------------------------------------------------------------------------------------------------------------------------------------------------------------------------------------------------------------------------------------------------------------------------------------------------------------------------------------------------------------------------------------------------------------------------------|
| 24(4), 36(1), 50(0), 68(0), 79(2), 98(0), 103(1), 111(1), 143(0), 147(3), 179(0), 237(3), 246(16), 270(12), 302(5), 308(2), 327(3), 338(3), 349(4), 361(3), 422(4), 474(20), 522(1), 557(2), 591(7), 599(1), 742(35), 752(11), 778(122), 781(24), 800(3), 818(2), 836(53), 842(20), 882(2), 898(2), 911(3), 918(3), 923(2), 937(1), 970(4), 988(7), 1037(37), 1041(16), 1063(1), 1065(1), 1075(17), 1076(4), 1143(0), 1144(0), 1276(0), 1277(0), 1365(2), 1374(5), 1421(42), 1425(27), 1441(19), 1445(26), 1529(13), 1558(21), 2118(50), 2162(4), 3277(1), 3277(1), 3280(1), 3280(0), 3288(0), 3290(0), 3301(1), 3301(0), 3308(1), 3308(2) | 26(2), 33(2), 39(1), 75(2), 80(1), 95(0), 103(2), 127(0), 131(1), 162(1), 181(9), 217(7), 235(2), 248(12), 282(7), 295(3), 312(14), 320(2), 353(4), 363(6), 403(5), 478(18), 497(1), 530(2), 554(10), 561(0), 705(26), 714(12), 743(86), 746(60), 769(4), 787(14), 804(30), 808(17), 823(2), 840(2), 853(1), 858(2), 864(1), 878(2), 935(5), 952(8), 995(28), 1004(20), 1020(8), 1029(0), 1030(9), 1034(7), 1096(0), 1098(0), 1223(0), 1223(0), 1300(1), 1313(7), 1346(48), 1353(25), 1378(24), 1386(22), 1446(8), 1469(15), 1961(23), 2008(11), 3167(0), 3167(0), 3170(0), 3170(0), 3177(0), 3179(1), 3189(0), 3192(0), 3199(2), 3199(2) |

Table S45 Theoretical harmonic vibrational frequencies (in  $\text{cm}^{-1}$ ) and IR intensities (in  $\text{km/mol}$ ) of  $\text{Cp}_2\text{Pd}_2(\text{CN})_2$  **2CN-5S** by MPW1PW91 and BP86 methods

| MPW1PW91                                                                                                                                                                                                                                                                                                                                                                                                                                                                                                                                                                                                                             | BP86                                                                                                                                                                                                                                                                                                                                                                                                                                                                                                                                                                                                                                |
|--------------------------------------------------------------------------------------------------------------------------------------------------------------------------------------------------------------------------------------------------------------------------------------------------------------------------------------------------------------------------------------------------------------------------------------------------------------------------------------------------------------------------------------------------------------------------------------------------------------------------------------|-------------------------------------------------------------------------------------------------------------------------------------------------------------------------------------------------------------------------------------------------------------------------------------------------------------------------------------------------------------------------------------------------------------------------------------------------------------------------------------------------------------------------------------------------------------------------------------------------------------------------------------|
| 17(7), 43(0), 46(0), 65(1), 66(2), 73(2), 87(0), 103(1), 126(0), 129(0), 148(2), 158(0), 255(0), 282(0), 303(61), 317(1), 321(0), 325(0), 334(0), 346(2), 365(29), 367(0), 502(0), 528(0), 589(0), 590(3), 744(49), 745(5), 777(136), 778(0), 786(1), 801(0), 836(88), 839(1), 892(0), 892(3), 914(0), 914(2), 927(0), 928(1), 973(12), 974(0), 1038(47), 1040(25), 1058(0), 1062(0), 1073(12), 1074(11), 1142(0), 1142(0), 1276(0), 1276(0), 1354(0), 1361(0), 1429(106), 1429(47), 1431(0), 1432(1), 1546(52), 1548(4), 2145(0), 2151(0), 3279(1), 3279(0), 3279(1), 3279(0), 3289(0), 3289(1), 3302(0), 3302(1), 3308(2), 3308(1) | 20(6), 27(0), 48(0), 63(1), 66(1), 77(0), 78(0), 118(0), 119(0), 126(0), 134(0), 141(0), 250(0), 258(0), 289(4), 297(2), 310(0), 314(0), 326(22), 335(2), 348(28), 368(1), 432(0), 501(0), 553(1), 564(2), 689(45), 699(7), 726(6), 736(139), 737(0), 765(0), 801(69), 804(1), 840(0), 840(4), 861(1), 861(0), 871(0), 871(2), 928(14), 930(0), 997(49), 1000(22), 1009(1), 1019(0), 1031(12), 1032(11), 1095(0), 1095(0), 1224(0), 1224(0), 1270(2), 1290(0), 1361(103), 1362(49), 1364(0), 1365(0), 1475(49), 1478(2), 1976(0), 1987(0), 3168(0), 3168(1), 3168(1), 3168(0), 3178(0), 3178(0), 3192(0), 3192(0), 3198(3), 3198(1) |

Table S46 Theoretical harmonic vibrational frequencies (in  $\text{cm}^{-1}$ ) and IR intensities (in  $\text{km/mol}$ ) of  $\text{Cp}_2\text{Pd}_2(\text{CN})_2$  **2CN-6S** by MPW1PW91 and BP86 methods

| MPW1PW91                                                                                                                                                                                                                                                                                                                                                                                                                                                                                                                                                                                                                                 | BP86                                                                                                                                                                                                                                                                                                                                                                                                                                                                                                                                                                                                                                |
|------------------------------------------------------------------------------------------------------------------------------------------------------------------------------------------------------------------------------------------------------------------------------------------------------------------------------------------------------------------------------------------------------------------------------------------------------------------------------------------------------------------------------------------------------------------------------------------------------------------------------------------|-------------------------------------------------------------------------------------------------------------------------------------------------------------------------------------------------------------------------------------------------------------------------------------------------------------------------------------------------------------------------------------------------------------------------------------------------------------------------------------------------------------------------------------------------------------------------------------------------------------------------------------|
| 18(0), 50(0), 51(20), 65(14), 81(0), 103(2), 111(0), 158(45), 160(0), 228(0), 235(6), 270(33), 277(0), 291(0), 301(0), 304(0), 333(4), 355(0), 371(65), 401(0), 421(3), 428(0), 604(0), 605(4), 624(0), 625(1), 793(4), 800(0), 805(0), 806(163), 818(0), 820(2), 829(0), 832(71), 842(0), 846(3), 888(0), 905(2), 911(3), 926(0), 996(15), 996(10), 1026(26), 1031(0), 1053(41), 1064(0), 1074(0), 1081(0), 1117(4), 1119(0), 1273(0), 1273(0), 1341(0), 1369(88), 1401(7), 1424(0), 1425(0), 1434(21), 1463(0), 1466(15), 2248(7), 2250(0), 3273(0), 3273(3), 3275(2), 3276(0), 3283(8), 3283(0), 3288(20), 3288(0), 3299(10), 3299(0) | 3(1), 47(17), 49(0), 61(13), 77(0), 983(1), 111(0), 153(0), 154(35), 207(0), 208(5), 251(0), 260(15), 280(0), 284(0), 287(0), 318(2), 339(0), 363(47), 385(0), 399(2), 402(0), 574(2), 577(0), 587(0), 587(1), 761(68), 764(0), 766(46), 767(0), 783(0), 783(4), 784(0), 789(80), 799(1), 802(0), 839(0), 852(2), 857(1), 868(0), 953(15), 953(0), 985(19), 988(0), 1015(27), 1024(0), 1032(0), 1040(0), 1068(2), 1070(0), 1219(0), 1220(0), 1285(0), 1309(54), 1335(5), 1352(0), 1359(0), 1366(19), 1396(0), 1399(13), 2117(2), 2120(0), 3163(0), 3163(3), 3164(1), 3165(0), 3172(3), 3172(0), 3177(13), 3177(0), 3187(5), 3187(0) |

Table S47 Theoretical harmonic vibrational frequencies (in  $\text{cm}^{-1}$ ) and IR intensities (in  $\text{km/mol}$ ) of  $\text{Cp}_2\text{Pd}_2(\text{CO})_2$  **2CO-1S** by MPW1PW91 and BP86 methods

| MPW1PW91                                                                                                                                                                                                                                                                                                                                                                                                                                                                                                                                                                                                                                      | BP86                                                                                                                                                                                                                                                                                                                                                                                                                                                                                                                                                                                                                                  |
|-----------------------------------------------------------------------------------------------------------------------------------------------------------------------------------------------------------------------------------------------------------------------------------------------------------------------------------------------------------------------------------------------------------------------------------------------------------------------------------------------------------------------------------------------------------------------------------------------------------------------------------------------|---------------------------------------------------------------------------------------------------------------------------------------------------------------------------------------------------------------------------------------------------------------------------------------------------------------------------------------------------------------------------------------------------------------------------------------------------------------------------------------------------------------------------------------------------------------------------------------------------------------------------------------|
| 8(0), 11(0), 26(1), 76(0), 79(0), 80(0), 104(0), 169(0), 176(2), 198(0), 221(17), 228(0), 247(8), 252(0), 292(103), 333(2), 394(1), 428(24), 431(2), 445(0), 461(7), 591(0), 599(26), 603(3), 613(0), 669(511), 760(35), 762(4), 787(223), 789(6), 833(0), 833(2), 837(0), 840(32), 841(2), 845(0), 895(0), 895(17), 897(1), 898(0), 1012(0), 1012(25), 1039(5), 1039(39), 1068(0), 1070(25), 1072(0), 1074(1), 1146(0), 1146(0), 1275(0), 1275(0), 1394(0), 1399(93), 1400(0), 1408(1), 1449(4), 1450(0), 1490(10), 1491(0), 1973(1072), 2020(109), 3272(0), 3272(0), 3274(0), 3274(0), 3285(0), 3285(2), 3292(0), 3292(1), 3301(6), 3301(1) | -11(0), 5(0), 32(1), 73(0), 75(0), 77(0), 105(0), 161(9), 163(0), 187(0), 207(10), 214(0), 222(3), 230(0), 282(57), 313(2), 371(2), 417(0), 420(14), 426(1), 449(5), 562(5), 568(2), 571(0), 574(1), 644(365), 726(36), 728(8), 756(207), 757(7), 779(2), 779(0), 804(0), 807(26), 809(0), 811(0), 837(0), 839(1), 845(4), 846(1), 973(25), 973(0), 996(0), 997(33), 1030(14), 1031(0), 1033(0), 1034(0), 1099(0), 1099(0), 1222(0), 1222(0), 1329(0), 1331(1), 1340(44), 1346(1), 1390(0), 1392(7), 1417(0), 1417(0), 1852(815), 1885(150), 3163(0), 3163(0), 3165(0), 3165(1), 3176(0), 3177(4), 3182(0), 3182(3), 3191(7), 3191(0) |

Table S48 Theoretical harmonic vibrational frequencies (in  $\text{cm}^{-1}$ ) and IR intensities (in  $\text{km/mol}$ ) of  $\text{Cp}_2\text{Pd}_2(\text{CO})_2$  **2CO-2S** by MPW1PW91 and BP86 methods

| MPW1PW91                                                                                                                                                                                                                                                                                                                                                                                                                                                                                                                                                                                                                                | BP86                                                                                                                                                                                                                                                                                                                                                                                                                                                                                                                                                                                                                                  |
|-----------------------------------------------------------------------------------------------------------------------------------------------------------------------------------------------------------------------------------------------------------------------------------------------------------------------------------------------------------------------------------------------------------------------------------------------------------------------------------------------------------------------------------------------------------------------------------------------------------------------------------------|---------------------------------------------------------------------------------------------------------------------------------------------------------------------------------------------------------------------------------------------------------------------------------------------------------------------------------------------------------------------------------------------------------------------------------------------------------------------------------------------------------------------------------------------------------------------------------------------------------------------------------------|
| 30(0), 53(0), 55(1), 58(0), 66(0), 82(0), 84(1), 114(0), 135(2), 143(9), 148(0), 155(0), 282(24), 303(0), 338(0), 341(0), 348(2), 374(0), 421(33), 430(40), 436(0), 444(0), 625(25), 625(0), 629(0), 637(0), 750(91), 755(0), 805(83), 811(0), 826(2), 827(0), 831(61), 832(0), 852(2), 859(0), 907(46), 911(8), 914(0), 919(0), 1000(0), 1002(8), 1027(19), 1029(0), 1068(0), 1069(36), 1071(0), 1075(0), 1126(1), 1129(0), 1272(0), 1272(0), 1394(27), 1398(0), 1401(0), 1403(0), 1435(0), 1439(6), 1536(40), 1549(0), 2143(1937), 2154(0), 3242(0), 3243(3), 3243(0), 3244(1), 3256(6), 3257(0), 3269(0), 3269(5), 3277(20), 3277(0) | 26(0), 38(0), 52(1), 52(0), 55(0), 65(0), 79(0), 109(0), 124(2), 128(10), 137(0), 146(0), 271(14), 290(0), 318(0), 320(0), 336(2), 363(0), 417(28), 431(0), 435(17), 449(0), 592(11), 597(0), 601(0), 602(0), 716(109), 720(0), 773(82), 777(0), 794(35), 794(0), 794(2), 795(0), 815(1), 819(0), 860(9), 863(0), 865(38), 875(0), 961(0), 962(7), 985(19), 988(0), 1029(0), 1029(28), 1031(0), 1035(0), 1081(1), 1083(0), 1219(0), 1220(0), 1329(17), 1329(1), 1334(0), 1335(0), 1369(0), 1374(4), 1464(27), 1475(0), 2006(1709), 2017(0), 3135(0), 3135(3), 3135(0), 3135(0), 3147(7), 3147(0), 3160(0), 3160(7), 3168(23), 3168(0) |

Table S49 Theoretical harmonic vibrational frequencies (in  $\text{cm}^{-1}$ ) and IR intensities (in  $\text{km/mol}$ ) of  $\text{Cp}_2\text{Pd}_2(\text{CO})_2$  **2CO-3S** by MPW1PW91 and BP86 methods

| MPW1PW91                                                                                                                                                                                                                                                                                                                                                                                                                                                                                                                                                                                                                                 | BP86                                                                                                                                                                                                                                                                                                                                                                                                                                                                                                                                                                                                                          |
|------------------------------------------------------------------------------------------------------------------------------------------------------------------------------------------------------------------------------------------------------------------------------------------------------------------------------------------------------------------------------------------------------------------------------------------------------------------------------------------------------------------------------------------------------------------------------------------------------------------------------------------|-------------------------------------------------------------------------------------------------------------------------------------------------------------------------------------------------------------------------------------------------------------------------------------------------------------------------------------------------------------------------------------------------------------------------------------------------------------------------------------------------------------------------------------------------------------------------------------------------------------------------------|
| 31(0), 55(0), 56(0), 60(0), 76(0), 83(0), 83(0), 109(1), 112(1), 143(8), 148(0), 162(0), 279(19), 306(0), 335(2), 336(0), 340(0), 366(1), 430(31), 434(46), 439(0), 441(1), 622(0), 629(35), 633(0), 637(0), 747(73), 753(0), 802(109), 813(2), 825(0), 826(3), 831(55), 837(0), 844(3), 855(0), 905(36), 913(0), 913(12), 922(3), 995(0), 996(7), 1023(5), 1029(16), 1064(30), 1071(0), 1071(0), 1073(4), 1126(0), 1128(1), 1272(0), 1273(0), 1388(27), 1393(2), 1395(0), 1404(0), 1435(0), 1439(3), 1552(50), 1562(3), 2144(1838), 2155(47), 3237(1), 3237(2), 3238(0), 3239(2), 3254(0), 3254(5), 3269(0), 3269(7), 3276(15), 3276(3) | 27(0), 50(0), 51(0), 53(0), 68(0), 74(0), 76(0), 90(3), 102(1), 133(7), 133(0), 153(0), 265(11), 292(0), 315(0), 317(0), 321(1), 355(1), 423(34), 423(0), 445(16), 455(1), 593(0), 597(18), 602(0), 604(0), 713(89), 719(0), 771(106), 781(2), 793(0), 794(3), 795(30), 799(0), 810(3), 860(30), 862(0), 862(13), 876(3), 955(0), 957(6), 983(2), 988(17), 1023(28), 1031(0), 1031(1), 1032(3), 1082(0), 1084(2), 1220(0), 1220(0), 1322(19), 1325(3), 1326(0), 1337(0), 1367(0), 1373(2), 1480(36), 1488(3), 2008(1611), 2019(52), 3129(2), 3129(1), 3130(0), 3130(2), 3145(0), 3145(6), 3160(0), 3160(9), 3167(16), 3167(3) |

Table S50 Theoretical harmonic vibrational frequencies (in  $\text{cm}^{-1}$ ) and IR intensities (in  $\text{km/mol}$ ) of  $\text{Cp}_2\text{Pd}_2(\text{CO})_2$  **2CO-4S** by MPW1PW91 and BP86 methods

| MPW1PW91                                                                                                                                                                                                                                                                                                                                                                                                                                                                                                                                                                                                                                 | BP86                                                                                                                                                                                                                                                                                                                                                                                                                                                                                                                                                                                                                                  |
|------------------------------------------------------------------------------------------------------------------------------------------------------------------------------------------------------------------------------------------------------------------------------------------------------------------------------------------------------------------------------------------------------------------------------------------------------------------------------------------------------------------------------------------------------------------------------------------------------------------------------------------|---------------------------------------------------------------------------------------------------------------------------------------------------------------------------------------------------------------------------------------------------------------------------------------------------------------------------------------------------------------------------------------------------------------------------------------------------------------------------------------------------------------------------------------------------------------------------------------------------------------------------------------|
| 27(1), 24(0), 38(2), 60(0), 62(0), 78(1), 93(1), 134(2), 141(5), 148(0), 175(1), 227(1), 241(1), 255(4), 281(17), 320(9), 342(7), 357(5), 405(21), 434(22), 461(17), 560(45), 585(52), 596(30), 601(22), 635(21), 742(28), 748(9), 775(106), 779(77), 809(28), 824(0), 833(2), 842(30), 843(1), 857(11), 891(0), 898(3), 905(9), 911(6), 993(5), 1003(12), 1014(10), 1043(18), 1062(17), 1068(9), 1071(8), 1088(6), 1128(1), 1146(0), 1266(0), 1274(0), 1351(3), 1387(3), 1415(63), 1422(5), 1449(41), 1462(2), 1499(1), 1531(5), 1989(515), 2146(1195), 3185(4), 3258(1), 3267(1), 3272(0), 3279(2), 3281(2), 3286(4), 3293(0), 3301(3) | 20(0), 28(0), 44(1), 58(0), 62(0), 77(1), 94(1), 118(2), 136(0), 147(3), 156(1), 214(1), 229(1), 248(6), 267(7), 303(4), 333(3), 349(3), 396(17), 438(14), 451(17), 535(15), 553(26), 565(41), 573(23), 607(12), 703(37), 710(10), 741(96), 744(63), 772(28), 789(1), 796(2), 802(0), 808(21), 819(8), 842(0), 844(2), 852(5), 857(10), 953(6), 963(11), 976(9), 1001(16), 1025(13), 1029(8), 1031(5), 1045(6), 1082(1), 1099(0), 1215(0), 1222(0), 1287(4), 1323(2), 1350(49), 1360(10), 1383(27), 1391(3), 1431(0), 1457(5), 1865(416), 2010(1058), 3078(5), 3146(1), 3154(1), 3159(1), 3163(0), 3171(4), 3174(6), 3184(1), 3191(3) |

Table S51 Theoretical harmonic vibrational frequencies (in  $\text{cm}^{-1}$ ) and IR intensities (in  $\text{km/mol}$ ) of  $\text{Cp}_2\text{Pd}_2(\text{CNCH}_3)_2$  **2CNCH<sub>3</sub>-1S** by MPW1PW91 and BP86 methods

| MPW1PW91                                                                                                                                                                                                                                                                                                                                                                                                                                                                                                                                                                                                                                                                                                                                                                                                                                                         | BP86                                                                                                                                                                                                                                                                                                                                                                                                                                                                                                                                                                                                                                                                                                                                                                                                                                                           |
|------------------------------------------------------------------------------------------------------------------------------------------------------------------------------------------------------------------------------------------------------------------------------------------------------------------------------------------------------------------------------------------------------------------------------------------------------------------------------------------------------------------------------------------------------------------------------------------------------------------------------------------------------------------------------------------------------------------------------------------------------------------------------------------------------------------------------------------------------------------|----------------------------------------------------------------------------------------------------------------------------------------------------------------------------------------------------------------------------------------------------------------------------------------------------------------------------------------------------------------------------------------------------------------------------------------------------------------------------------------------------------------------------------------------------------------------------------------------------------------------------------------------------------------------------------------------------------------------------------------------------------------------------------------------------------------------------------------------------------------|
| 9(1), 11(0), 19(4), 33(7), 41(0), 43(0), 57(0), 75(2), 78(0), 113(0), 128(1), 140(8), 145(0), 148(0), 157(7), 172(0), 177(3), 184(0), 271(26), 294(0), 323(35), 336(0), 340(4), 342(0), 366(3), 381(0), 422(25), 433(0), 622(34), 624(0), 631(0), 638(0), 739(76), 746(0), 789(114), 795(0), 824(0), 826(0), 827(41), 827(0), 832(7), 835(0), 891(34), 898(10), 900(0), 904(0), 997(0), 999(8), 1024(20), 1026(0), 1033(0), 1037(0), 1066(0), 1066(29), 1069(0), 1072(0), 1123(1), 1126(0), 1134(0), 1134(0), 1136(0), 1136(0), 1270(0), 1271(0), 1393(28), 1398(0), 1400(0), 1404(0), 1435(0), 1439(4), 1448(127), 1450(0), 1485(0), 1485(23), 1487(0), 1487(23), 1532(42), 1544(0), 2266(2582), 2276(0), 3082(108), 3082(0), 3171(0), 3171(12), 3172(0), 3172(11), 3237(0), 3237(3), 3237(1), 3237(3), 3249(7), 3249(16), 3262(0), 3262(19), 3270(32), 3270(0) | 11(0), 12(0), 16(4), 31(6), 32(0), 39(0), 48(0), 50(0), 69(3), 108(0), 119(1), 124(10), 134(0), 142(0), 144(7), 152(0), 157(5), 165(0), 262(16), 285(0), 315(0), 316(0), 332(1), 336(31), 348(0), 349(0), 393(19), 405(0), 588(16), 595(0), 601(0), 601(0), 703(97), 709(0), 758(95), 762(0), 790(0), 790(0), 791(29), 794(0), 797(0), 798(5), 844(12), 846(0), 850(28), 861(0), 957(0), 959(7), 983(18), 985(0), 997(3), 1001(0), 1026(24), 1026(0), 1028(0), 1031(0), 1077(3), 1080(0), 1086(0), 1086(1), 1087(0), 1087(1), 1217(0), 1217(0), 1327(20), 1329(0), 1334(0), 1334(0), 1368(0), 1373(2), 1394(168), 1395(0), 1431(0), 1431(21), 1431(0), 1431(20), 1461(31), 1472(0), 2138(2572), 2148(0), 2968(152), 2968(0), 3046(0), 3146(19), 3148(0), 3148(16), 3127(0), 3127(3), 3127(1), 3127(5), 3138(15), 3138(9), 3052(0), 3152(23), 3160(35), 3160(0) |

Table S52 Theoretical harmonic vibrational frequencies (in  $\text{cm}^{-1}$ ) and IR intensities (in  $\text{km/mol}$ ) of  $\text{Cp}_2\text{Pd}_2(\text{CNCH}_3)_2 \mathbf{2CNCH}_3\text{-2S}$  by MPW1PW91 and BP86 methods

| MPW1PW91                                                                                                                                                                                                                                                                                                                                                                                                                                                                                                                                                                                                                                                                                                                                                                                                                                                                       | BP86                                                                                                                                                                                                                                                                                                                                                                                                                                                                                                                                                                                                                                                                                                                                                                                                                                                                   |
|--------------------------------------------------------------------------------------------------------------------------------------------------------------------------------------------------------------------------------------------------------------------------------------------------------------------------------------------------------------------------------------------------------------------------------------------------------------------------------------------------------------------------------------------------------------------------------------------------------------------------------------------------------------------------------------------------------------------------------------------------------------------------------------------------------------------------------------------------------------------------------|------------------------------------------------------------------------------------------------------------------------------------------------------------------------------------------------------------------------------------------------------------------------------------------------------------------------------------------------------------------------------------------------------------------------------------------------------------------------------------------------------------------------------------------------------------------------------------------------------------------------------------------------------------------------------------------------------------------------------------------------------------------------------------------------------------------------------------------------------------------------|
| 16(0), 22(0), 32(0), 59(1), 74(1), 75(0), 85(8), 98(1), 102(0), 114(13), 131(10), 152(0), 172(0), 175(5), 183(17), 199(0), 226(60), 238(6), 246(4), 254(2), 287(86), 328(2), 382(0), 387(5), 422(12), 457(0), 491(25), 598(15), 602(12), 604(2), 611(3), 675(418), 750(22), 754(10), 775(255), 777(22), 811(0), 811(6), 840(1), 841(2), 841(17), 844(0), 878(0), 878(12), 889(4), 890(1), 1015(32), 1015(0), 1028(32), 1037(3), 1038(0), 1038(33), 1070(12), 1071(0), 1073(2), 1073(0), 1118(22), 1118(7), 1128(2), 1128(1), 1147(0), 1147(0), 1275(0), 1275(0), 1396(27), 1397(0), 1409(27), 1411(2), 1431(64), 1433(16), 1457(0), 1457(5), 1481(2), 1482(3), 1485(7), 1485(1), 1486(24), 1486(0), 1953(1437), 1993(330), 3056(119), 3057(30), 3148(22), 3148(1), 3161(1), 3161(19), 3267(1), 3267(0), 3271(0), 3271(0), 3282(0), 3282(8), 3288(1), 3288(3), 3298(8), 3298(1) | 22(0), 28(0), 32(0), 56(2), 72(1), 74(0), 84(4), 89(1), 91(0), 112(10), 131(9), 143(0), 158(14), 160(0), 164(4), 185(0), 217(14), 219(2), 237(34), 243(6), 282(56), 315(1), 368(8), 377(0), 402(5), 435(0), 487(23), 563(5), 568(2), 569(7), 581(4), 655(323), 710(18), 714(12), 741(226), 742(16), 767(15), 767(0), 806(0), 807(1), 808(10), 810(0), 829(0), 829(11), 838(2), 839(1), 974(41), 974(0), 976(10), 983(1), 996(0), 997(32), 1031(8), 1032(0), 1033(0), 1033(1), 1072(6), 1072(13), 1079(0), 1079(2), 1100(0), 1100(0), 1221(0), 1221(0), 1333(17), 1336(0), 1344(17), 1346(1), 1374(67), 1376(20), 1394(0), 1395(5), 1416(3), 1416(0), 1428(7), 1428(0), 1431(20), 1431(2), 1842(1068), 1871(285), 2946(131), 2946(37), 3031(27), 3031(1), 3043(2), 3043(23), 3157(1), 3157(0), 3161(0), 3161(0), 3172(0), 3172(13), 3178(2), 3178(7), 3188(10), 3188(1) |

Table S53 Theoretical harmonic vibrational frequencies (in  $\text{cm}^{-1}$ ) and IR intensities (in  $\text{km/mol}$ ) of  $\text{Cp}_2\text{Pd}_2(\text{CNCH}_3)_2 \mathbf{2CNCH}_3\text{-3S}$  by MPW1PW91 and BP86 methods

| MPW1PW91                                                                                                                                                                                                                                                                                                                                                                                                                                                                                                                                                                                                                                                                                                                                                                                                                                                                                                                        | BP86                                                                                                                                                                                                                                                                                                                                                                                                                                                                                                                                                                                                                                                                                                                                                                                                                                                                                                                          |
|---------------------------------------------------------------------------------------------------------------------------------------------------------------------------------------------------------------------------------------------------------------------------------------------------------------------------------------------------------------------------------------------------------------------------------------------------------------------------------------------------------------------------------------------------------------------------------------------------------------------------------------------------------------------------------------------------------------------------------------------------------------------------------------------------------------------------------------------------------------------------------------------------------------------------------|-------------------------------------------------------------------------------------------------------------------------------------------------------------------------------------------------------------------------------------------------------------------------------------------------------------------------------------------------------------------------------------------------------------------------------------------------------------------------------------------------------------------------------------------------------------------------------------------------------------------------------------------------------------------------------------------------------------------------------------------------------------------------------------------------------------------------------------------------------------------------------------------------------------------------------|
| 14(0), 14(0), 20(4), 34(7), 42(0), 42(1),<br>74(0), 75(2), 88(0), 104(1), 114(1), 139(8),<br>145(0), 153(4), 167(3), 173(1), 175(4),<br>178(0), 263(22), 298(0), 325(23), 337(0),<br>341(13), 347(1), 362(3), 383(1), 424(28),<br>429(0), 622(0), 625(47), 635(0), 735(62),<br>742(0), 786(130), 799(3), 821(0), 825(0),<br>828(35), 829(9), 832(0), 834(0), 891(30),<br>899(0), 900(15), 908(2), 993(0), 995(8),<br>1020(7), 1025(16), 1035(1), 1038(0),<br>1061(23), 1069(0), 1069(0), 1069(4),<br>1122(1), 1125(1), 1135(0), 1135(0),<br>1135(0), 1135(0), 1270(0), 1270(0),<br>1386(30), 1394(0), 1395(0), 1402(0),<br>1435(0), 1439(2), 1448(119), 1449(3),<br>1485(0), 1485(23), 1486(3), 1486(20),<br>1550(56), 1559(1), 2269(2422), 2279(80),<br>3082(99), 3082(5), 3171(2), 3171(9),<br>3172(2), 3172(10), 3230(4), 3230(5), 3230<br>(0), 3231(5), 3244(0), 3244(0), 3244(22),<br>3262(4), 3262(25), 3269(22), 3269(0) | 18(0), 18(0), 19(3), 33(6), 38(0), 40(1),<br>62(0), 69(2), 79(0), 84(3), 107(0), 127(9),<br>132(0), 142(5), 153(5), 155(0), 160(1),<br>160(2), 252(13), 287(0), 313(0), 314(0),<br>327(2), 336(20), 354(2), 357(10), 396(21),<br>398(0), 593(25), 593(0), 599(0), 605(0),<br>701(81), 707(0), 755(114), 767(3), 788(0),<br>791(19), 793(0), 794(0), 797(8), 798(0),<br>847(0), 848(27), 848(16), 863(3), 953(0),<br>955(7), 980(3), 984(17), 1000(4), 1004(0),<br>1020(21), 1028(2), 1028(0), 1029(0),<br>1078(3), 1080(2), 1087(0), 1087(1),<br>1087(1), 1088(0), 1217(0), 1217(0),<br>1320(22), 1325(0), 1327(0), 1335(0),<br>1366(0), 1372(1), 1394(154), 1395(5),<br>1431(0), 1431(21), 1432(4), 1432(18),<br>1479(45), 1487(1), 2142(2387), 2152(100),<br>2968(137), 2968(9), 3047(1), 3047(16),<br>3047(3), 3047(15), 3120(5), 3120(4),<br>3120(0), 3121(6), 3134(0), 3134(22),<br>3052(5), 3152(29), 3159(24), 3159(0) |



Table S54 Theoretical harmonic vibrational frequencies (in  $\text{cm}^{-1}$ ) and IR intensities (in  $\text{km/mol}$ ) of  $\text{Cp}_2\text{Pd}_2(\text{CNCH}_3)_2 \mathbf{2CNCH}_3\text{-4S}$  by MPW1PW91 and BP86 methods

| MPW1PW91                                                                                                                                                                                                                                                                                                                                                                                                                                                                                                                                                                                                                                                                                                                                                                                                                                                                         | BP86                                                                                                                                                                                                                                                                                                                                                                                                                                                                                                                                                                                                                                                                                                                                                                                                                                                                  |
|----------------------------------------------------------------------------------------------------------------------------------------------------------------------------------------------------------------------------------------------------------------------------------------------------------------------------------------------------------------------------------------------------------------------------------------------------------------------------------------------------------------------------------------------------------------------------------------------------------------------------------------------------------------------------------------------------------------------------------------------------------------------------------------------------------------------------------------------------------------------------------|-----------------------------------------------------------------------------------------------------------------------------------------------------------------------------------------------------------------------------------------------------------------------------------------------------------------------------------------------------------------------------------------------------------------------------------------------------------------------------------------------------------------------------------------------------------------------------------------------------------------------------------------------------------------------------------------------------------------------------------------------------------------------------------------------------------------------------------------------------------------------|
| 20(0), 26(0), 30(0), 59(2), 69(0), 83(1), 90(2), 106(1), 108(1), 119(1), 129(33), 148(4), 168(8), 174(2), 180(16), 200(2), 220(23), 240(8), 244(15), 258(3), 284(73), 332(6), 376(9), 406(43), 411(8), 458(2), 488(46), 597(12), 601(7), 604(3), 613(3), 679(388), 751(31), 757(17), 779(189), 783(83), 800(0), 818(2), 839(0), 840(3), 841(13), 844(4), 873(1), 883(2), 885(4), 891(4), 1014(16), 1015(16), 1027(16), 1036(17), 1037(28), 1039(21), 1070(12), 1071(1), 1072(1), 1072(0), 1119(24), 1119(8), 1128(1), 1128(0), 1147(0), 1147(0), 1274(0), 1274(0), 1395(15), 1397(3), 1410(27), 1413(8), 1431(66), 1434(15), 1456(4), 1460(2), 1477(1), 1484(3), 1485(4), 1485(2), 1486(16), 1486(10), 1952(1404), 1993(347), 3056(95), 3057(58), 3148(13), 3148(9), 3061(7), 3161(13), 3267(0), 3268(0), 3270(0), 3273(1), 3280(5), 3285(3), 3286(3), 3290(2), 3296(5), 3300(4) | 15(0), 23(0), 31(0), 56(2), 68(1), 77(1), 84(1), 97(0), 99(1), 115(1), 130(17), 141(6), 151(6), 164(4), 165(13), 187(1), 202(9), 230(4), 236(9), 240(20), 281(47), 319(4), 364(0), 389(28), 403(8), 438(2), 482(47), 563(5), 567(2), 570(4), 583(5), 667(297), 713(28), 717(17), 747(173), 750(70), 757(1), 772(2), 804(0), 807(2), 807(10), 810(2), 827(1), 833(1), 835(3), 839(3), 973(27), 974(12), 976(2), 983(18), 994(14), 997(18), 1031(7), 1031(2), 1032(0), 1033(0), 1072(8), 1072(14), 1078(0), 1078(1), 1100(0), 1100(0), 1221(0), 1221(0), 1332(10), 1336(1), 1344(16), 1347(5), 1374(69), 1377(20), 1393(3), 1398(2), 1412(1), 1418(1), 1428(2), 1428(6), 1431(14), 1431(8), 1841(1036), 1872(310), 2944(101), 2945(71), 3031(17), 3031(11), 3043(9), 3043(16), 3157(0), 3158(0), 3160(0), 3163(1), 3171(8), 3175(6), 3175(5), 3180(3), 3185(6), 3190(5) |

Table S55 Theoretical harmonic vibrational frequencies (in  $\text{cm}^{-1}$ ) and IR intensities (in  $\text{km/mol}$ ) of  $\text{Cp}_2\text{Pd}_2(\text{CS})_2$  **2CS-1S** by MPW1PW91 and BP86 methods

| MPW1PW91                                                                                                                                                                                                                                                                                                                                                                                                                                                                                                                                                                                                                         | BP86                                                                                                                                                                                                                                                                                                                                                                                                                                                                                                                                                                                                                                |
|----------------------------------------------------------------------------------------------------------------------------------------------------------------------------------------------------------------------------------------------------------------------------------------------------------------------------------------------------------------------------------------------------------------------------------------------------------------------------------------------------------------------------------------------------------------------------------------------------------------------------------|-------------------------------------------------------------------------------------------------------------------------------------------------------------------------------------------------------------------------------------------------------------------------------------------------------------------------------------------------------------------------------------------------------------------------------------------------------------------------------------------------------------------------------------------------------------------------------------------------------------------------------------|
| -4(0), -3(0), 33(0), 66(0), 76(0), 81(0), 102(1), 147(1), 177(1), 177(0), 206(20), 214(0), 245(6), 257(0), 288(72), 316(4), 323(0), 377(6), 378(19), 413(2), 426(0), 596(2), 599(9), 600(0), 601(1), 634(215), 769(85), 773(13), 793(196), 795(6), 818(0), 819(5), 839(0), 841(11), 841(4), 843(0), 888(0), 889(1), 896(5), 897(1), 1018(0), 1018(24), 1036(0), 1037(32), 1070(0), 1071(4), 1071(1), 1072(0), 1148(0), 1148(0), 1233(954), 1274(0), 1294(175), 1396(9), 1396(0), 1406(7), 1409(6), 1459(0), 1461(11), 1478(1), 1479(1), 3273(0), 3274(0), 3276(0), 3276(0), 3288(0), 3288(1), 3291(0), 3291(1), 3302(4), 3302(1) | 13(0), 13(0), 34(1), 65(0), 73(0), 80(0), 101(1), 140(0), 168(0), 169(0), 180(17), 190(0), 219(5), 229(0), 278(47), 301(3), 308(0), 358(11), 363(5), 400(1), 419(0), 562(1), 566(1), 568(5), 569(0), 608(167), 728(70), 732(13), 758(187), 759(4), 773(0), 773(7), 806(0), 808(7), 809(2), 810(0), 838(0), 839(0), 844(4), 845(1), 979(0), 979(22), 995(0), 995(30), 1032(0), 1032(2), 1032(1), 1034(0), 1101(0), 1101(0), 1173(713), 1222(0), 1222(0), 1225(137), 1334(6), 1335(0), 1341(4), 1344(3), 1397(0), 1398(9), 1413(1), 1413(1), 3164(0), 3164(0), 3166(0), 3166(0), 3178(0), 3178(4), 3181(0), 3181(3), 3192(6), 3192(1) |

Table S56 Theoretical harmonic vibrational frequencies (in  $\text{cm}^{-1}$ ) and IR intensities (in  $\text{km/mol}$ ) of  $\text{Cp}_2\text{Pd}_2(\text{CS})_2$  **2CS-2S** by MPW1PW91 and BP86 methods

| MPW1PW91                                                                                                                                                                                                                                                                                                                                                                                                                                                                                                                                                                                                                                       | BP86                                                                                                                                                                                                                                                                                                                                                                                                                                                                                                                                                                                                                                    |
|------------------------------------------------------------------------------------------------------------------------------------------------------------------------------------------------------------------------------------------------------------------------------------------------------------------------------------------------------------------------------------------------------------------------------------------------------------------------------------------------------------------------------------------------------------------------------------------------------------------------------------------------|-----------------------------------------------------------------------------------------------------------------------------------------------------------------------------------------------------------------------------------------------------------------------------------------------------------------------------------------------------------------------------------------------------------------------------------------------------------------------------------------------------------------------------------------------------------------------------------------------------------------------------------------|
| 17(1), 28(0), 40(1), 47(1), 54(1), 75(2), 89(1), 120(9), 138(2), 153(1), 163(0), 177(3), 224(1), 234(2), 281(17), 297(8), 311(8), 334(1), 342(19), 382(4), 415(3), 555(65), 584(32), 594(5), 599(42), 626(22), 747(10), 750(26), 771(104), 779(67), 799(62), 829(0), 832(5), 836(3), 841(25), 851(9), 887(1), 895(3), 900(15), 908(3), 998(3), 1007(10), 1016(9), 1041(15), 1066(18), 1069(10), 1070(5), 1085(5), 1128(1), 1147(0), 1232(414), 1266(0), 1275(0), 1357(2), 1373(944), 1387(4), 1415(55), 1423(9), 1448(23), 1457(2), 1498(1), 1516(6), 3197(3), 3263(1), 3265(1), 3272(0), 3274(0), 3280(3), 3285(1), 3292(3), 3292(1), 3300(3) | 20(0), 26(0), 36(1), 42(0), 53(1), 73(2), 89(0), 117(2), 135(0), 143(4), 148(0), 165(3), 211(1), 239(3), 267(6), 274(7), 306(3), 321(1), 328(20), 370(1), 401(6), 519(61), 549(12), 564(20), 570(6), 603(12), 709(39), 715(17), 741(61), 743(99), 765(30), 787(6), 791(1), 803(0), 807(19), 814(7), 837(1), 838(3), 845(7), 860(7), 949(8), 967(9), 974(9), 999(15), 1026(12), 1030(4), 1031(5), 1042(7), 1079(1), 1100(0), 1177(336), 1212(0), 1221(0), 1287(2), 1299(749), 1326(5), 1348(30), 1360(13), 1379(14), 1390(7), 1430(2), 1452(6), 3079(4), 3147(2), 3156(1), 3157(1), 3163(0), 3167(2), 3171(4), 3175(7), 3183(1), 3191(4) |

Table S57 Theoretical harmonic vibrational frequencies (in  $\text{cm}^{-1}$ ) and IR intensities (in  $\text{km/mol}$ ) of  $\text{Cp}_2\text{Pd}_2(\text{CS})_2$  **2CS-3S** by MPW1PW91 and BP86 methods

| MPW1PW91                                                                                                                                                                                                                                                                                                                                                                                                                                                                                                                                                                                                                                   | BP86                                                                                                                                                                                                                                                                                                                                                                                                                                                                                                                                                                                                                                |
|--------------------------------------------------------------------------------------------------------------------------------------------------------------------------------------------------------------------------------------------------------------------------------------------------------------------------------------------------------------------------------------------------------------------------------------------------------------------------------------------------------------------------------------------------------------------------------------------------------------------------------------------|-------------------------------------------------------------------------------------------------------------------------------------------------------------------------------------------------------------------------------------------------------------------------------------------------------------------------------------------------------------------------------------------------------------------------------------------------------------------------------------------------------------------------------------------------------------------------------------------------------------------------------------|
| 16(0), 36(0), 36(0), 46(0), 63(1), 78(1), 90(0), 110(0), 133(0), 134(2), 140(15), 149(0), 268(15), 299(0), 304(7), 321(0), 336(0), 344(0), 370(12), 382(0), 384(10), 398(0), 624(17), 628(0), 631(0), 638(0), 753(96), 758(0), 803(91), 809(0), 825(7), 827(0), 829(61), 830(0), 845(1), 854(0), 898(41), 911(0), 911(6), 914(0), 1001(0), 1002(7), 1026(20), 1028(0), 1069(29), 1069(1), 1072(0), 1075(0), 1124(1), 1127(0), 1272(0), 1273(0), 1354(1846), 1372(0), 1392(17), 1398(0), 1398(19), 1404(0), 1434(0), 1439(87), 1533(29), 1546(0), 3246(0), 3246(2), 3247(0), 3247(0), 3258(0), 3258(0), 3268(0), 3268(6), 3277(22), 3277(0) | 12(0), 32(0), 33(0), 41(0), 57(0), 63(0), 72(1), 104(0), 116(0), 122(2), 125(14), 144(0), 261(10), 286(0), 291(5), 309(0), 317(0), 324(0), 369(2), 372(6), 378(0), 384(0), 592(7), 599(0), 602(0), 603(0), 719(114), 724(0), 770(87), 775(0), 791(0), 792(34), 793(5), 795(0), 808(1), 813(0), 855(33), 860(7), 862(0), 866(0), 962(0), 963(6), 984(19), 986(0), 1029(21), 1029(1), 1032(0), 1035(0), 1079(1), 1082(0), 1219(0), 1220(0), 1294(1391), 1310(0), 1327(9), 1330(34), 1332(0), 1335(0), 1368(0), 1374(59), 1460(17), 1472(0), 3137(0), 3137(3), 3138(0), 3138(0), 3148(6), 3149(0), 3159(0), 3159(7), 3167(24), 3168(0) |

Table S58 Theoretical harmonic vibrational frequencies (in  $\text{cm}^{-1}$ ) and IR intensities (in  $\text{km/mol}$ ) of  $\text{Cp}_2\text{Pd}_2(\text{CS})_2$  **2CS-4S** by MPW1PW91 and BP86 methods

| MPW1PW91                                                                                                                                                                                                                                                                                                                                                                                                                                                                                                                                                                                                                                   | BP86                                                                                                                                                                                                                                                                                                                                                                                                                                                                                                                                                                                                                                    |
|--------------------------------------------------------------------------------------------------------------------------------------------------------------------------------------------------------------------------------------------------------------------------------------------------------------------------------------------------------------------------------------------------------------------------------------------------------------------------------------------------------------------------------------------------------------------------------------------------------------------------------------------|-----------------------------------------------------------------------------------------------------------------------------------------------------------------------------------------------------------------------------------------------------------------------------------------------------------------------------------------------------------------------------------------------------------------------------------------------------------------------------------------------------------------------------------------------------------------------------------------------------------------------------------------|
| 19(0), 37(1), 40(0), 44(0), 74(1), 75(0), 91(0), 108(1), 119(1), 132(0), 140(14), 161(0), 274(17), 279(3), 306(0), 312(4), 332(0), 341(0), 380(8), 387(1), 388(12), 390(0), 623(0), 629(24), 634(0), 636(0), 751(79), 757(1), 798(120), 811(2), 825(0), 826(13), 828(41), 835(1), 836(2), 850(0), 895(29), 914(0), 914(3), 914(13), 996(0), 997(5), 1023(3), 1029(17), 1062(26), 1070(4), 1071(0), 1071(3), 1124(1), 1127(2), 1273(0), 1273(0), 1359(1697), 1378(84), 1385(18), 1392(5), 1395(0), 1400(0), 1431(0), 1436(87), 1553(41), 1562(2), 3240(1), 3240(2), 3241(0), 3241(1), 3255(0), 3255(4), 3267(6), 3267(0), 3276(16), 3276(3) | 18(0), 36(0), 38(0), 41(0), 69(1), 73(0), 78(0), 93(2), 113(1), 119(0), 130(11), 154(0), 261(10), 268(3), 293(0), 301(3), 310(2), 317(0), 371(0), 376(8), 379(0), 384(0), 594(0), 595(11), 600(0), 604(0), 718(95), 723(2), 764(112), 778(3), 790(15), 793(0), 793(10), 795(1), 802(3), 811(0), 848(22), 863(0), 863(15), 866(3), 957(0), 958(4), 983(1), 988(17), 1022(22), 1030(6), 1030(2), 1031(0), 1080(1), 1082(2), 1220(0), 1220(0), 1299(1233), 1315(88), 1319(11), 1324(19), 1325(0), 1333(0), 1364(0), 1370(62), 1480(27), 1487(3), 3129(1), 3129(2), 3131(0), 3131(2), 3146(0), 3146(4), 3157(0), 3158(8), 3167(17), 3167(4) |

### Complete Gaussian 09 reference (Reference 10)

Gaussian 09, Revision A.1, Frisch, M. J.; Trucks, G. W.; Schlegel, H. B.; Scuseria, G. E.; Robb, M. A.; Cheeseman, J. R.; Scalmani, G.; Barone, V.; Mennucci, B.; Petersson, G. A.; Nakatsuji, H.; Caricato, M.; Li, X.; Hratchian, H. P.; Izmaylov, A. F.; Bloino, J.; Zheng, G.; Sonnenberg, J. L.; Hada, M.; Ehara, M.; Toyota, K.; Fukuda, R.; Hasegawa, J.; Ishida, M.; Nakajima, T.; Honda, Y.; Kitao, O.; Nakai, H.; Vreven, T.; Montgomery, J. A.; Peralta, J. E.; Ogliaro, F.; Bearpark, M.; Heyd, J. J.; Brothers, E.; Kudin, K. N.; Staroverov, V. N.; Kobayashi, R.; Normand, J.; Raghavachari, K.; Rendell, A.; Burant, J. C.; Iyengar, S. S.; Tomasi, J.; Cossi, M.; Rega, N.; Millam, J. M.; Klene, M.; Knox, J. E.; Cross, J. B.; Bakken, V.; Adamo, C.; Jaramillo, J.; Gomperts, R.; Stratmann, R. E.; Yazyev, O.; Austin, A. J.; Cammi, R.; Pomelli, C.; Ochterski, J. W.; Martin, R. L.; Morokuma, K.; Zakrzewski, V. G.; Voth, G. A.; Salvador, P.; Dannenberg, J. J.; Dapprich, S.; Daniels, A. D.; Farkas, Ö.; Foresman, J. B.; Ortiz, J. V.; Cioslowski, J.; Fox, D. J. Gaussian, Inc., Wallingford CT, 2009.
